# Supplementary material for: Catalytic enantioselective synthesis of chiral 4-hydroxy 4′-substituted pyrazolones by the vinylogous aldol reaction of pyrazole-4,5-diones with 3-alkylidene-2-oxindoles
Source: Royal Society of Chemistry journal article supplement (doi:10.1039/d0nj05886f), 2021-01-01
Supplement: d0nj05886f1.pdf [file d0nj05886f1.pdf]

## Supporting information

### Catalytic Enantioselective Synthesis of Chiral 4-Hydroxy 4'-Substituted Pyrazolones by Vinylogous Aldol Reaction of Pyrazole-4,5-diones with 3-Alkylidene-2-Oxindoles

Krishna Kumar,<sup>§</sup> Bhuvnesh Singh,<sup>§</sup> Soumyadip Hore<sup>§</sup> and Ravi P. Singh<sup>§,\*</sup>

<sup>§,\*</sup>*Department of Chemistry, Indian Institute of Technology, Delhi, Hauz Khas, New Delhi – 110 016, India Fax: (+91)-11-2658-1102; phone: (+91)-11-2659-1502; e-mail: [ravips@chemistry.iitd.ac.in](mailto:ravips@chemistry.iitd.ac.in)*

#### Table of contents

|   |                                                          |        |
|---|----------------------------------------------------------|--------|
| 1 | General considerations                                   | S2     |
| 2 | Experimental section and Crystal structure               | S2-14  |
| 3 | References                                               | S15    |
| 4 | <sup>1</sup> H and <sup>13</sup> C spectrum of compounds | S16-28 |
| 5 | HPLC data of the compounds                               | S29-43 |

## 1. General Information

$^1\text{H}$  and  $^{13}\text{C}$  NMR spectra were recorded on a Bruker AV-300 instrument (300/400MHz and 75/100MHz, respectively) and internally referenced to Tetramethylsilane signal or residual protonated solvent signals. Data for  $^1\text{H}$  NMR are reported as follows: chemical shift ( $\delta$ , ppm), multiplicity (s- singlet; d- doublet; t- triplet; q- quartet; m- multiplet), integration, coupling constant (Hz). Data for  $^{13}\text{C}$  NMR are reported in terms of chemical shift ( $\delta$ , ppm). Perkin Elmer FT-IR Spectrometer was used to record infrared spectra and is reported in frequency of absorption. MS-TOF mass spectrometer and ESI mass spectrometer were used to record low resolution and high resolution mass spectra. Column chromatographic separations were carried out on silica gel (230–400 mesh). High performance liquid chromatography (HPLC) analysis was performed on a Agilent 1220 Infinity LC instrument equipped with a quaternary pump, using a Chiralpak IB-H, ID-H, IE-H, AD-H Column (250 x 4.6mm). UV absorption was monitored at 225 nm.

## 2. General procedure preparation of the catalysts:

Catalysts **I** were purchased from Sigma Aldrich and used without further purification. Catalyst **IV-V** was prepared according to known literature procedure.<sup>1</sup>

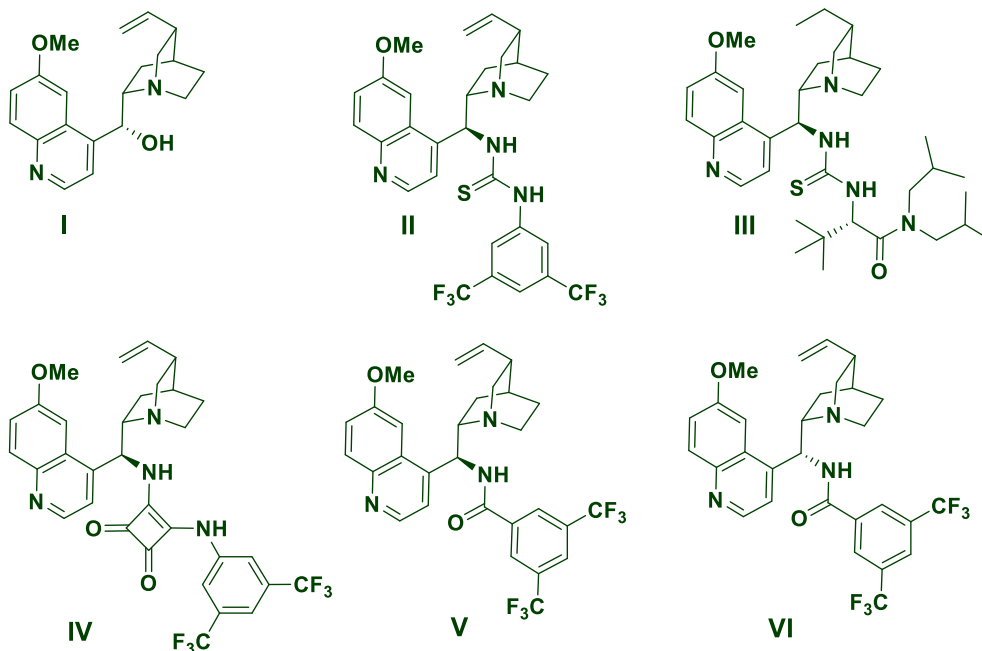

## 2.1. General procedure for the preparation of starting materials:

## 2.2. General procedure for the synthesis of 3-alkylidene oxindole (1)

3-alkylidene oxindole (D) were prepared by following the reported literature procedure.<sup>2</sup>

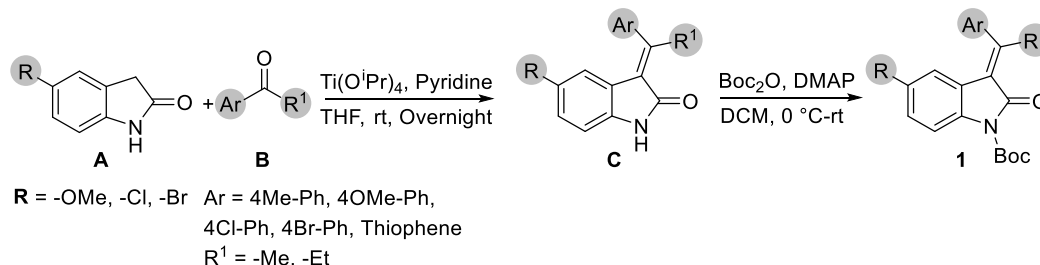

To a solution of 2-oxindole **A** (1.0 equiv.), acetophenone **B** (1.2 equiv.) in dry THF (0.5 M) was added pyridine (2.0 equiv.) and stirred for 10 min. Then titanium isopropoxide (3.0 equiv.) was added to the mixture and stirred at room temperature for overnight. After completion, reaction mixture was diluted with ethyl acetate and wash with 1(N) HCL, NaHCO<sub>3</sub>, and brine. The organic layer was dried over Na<sub>2</sub>SO<sub>4</sub>, concentrated in *vacuo*, and purified by flash column chromatography to afford **C**. Then compound **C** was dissolved in 0.2 (M) DCM and treated with boc-anhydride (1.2 equiv.), along with DMAP (0.5 equiv.) at 0 °C. The resulting solution was then kept to room temperature for 4 h. After completion reaction mixture was quenched with water and extracted with ethyl acetate. Organic phase was then washed with water, brine and dried over Na<sub>2</sub>SO<sub>4</sub>, solvent was removed in vacuum. The resulting residue was purified by flash chromatography on silica gel to afford **1**.

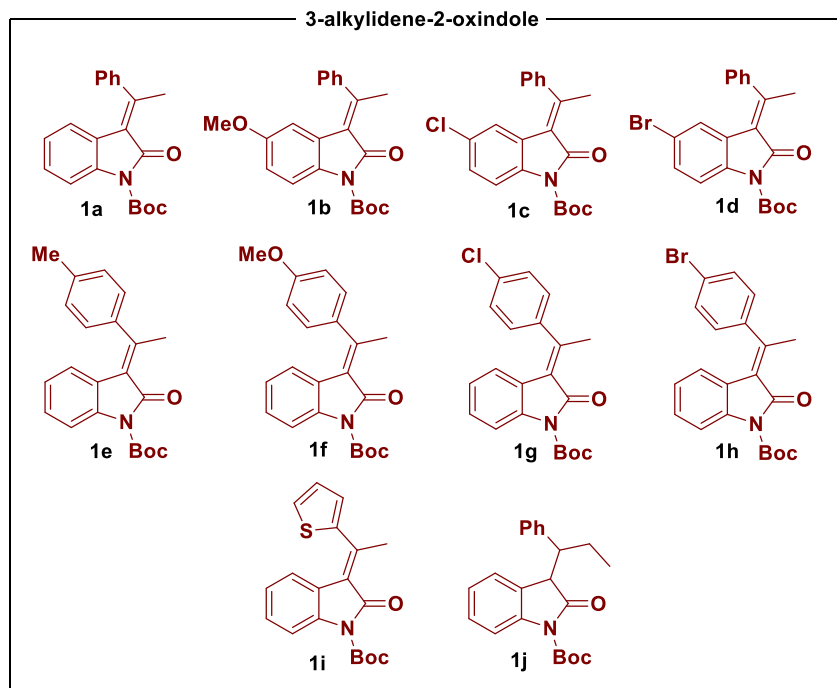

### 2.3. General procedure for the synthesis of Pyrazole-4,5-dione (**J**)

Pyrazole-4,5-dione (**J**) were prepared by following steps.<sup>3</sup>

#### 2.3.1. Step 1: Synthesis of pyrazolones (**G**)

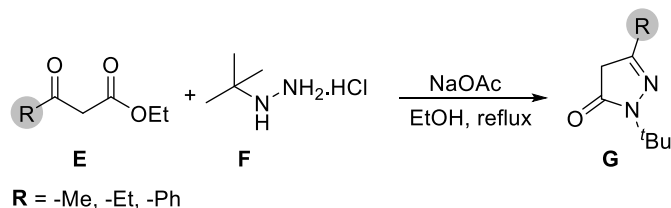

Tert-butylhydrazine hydrochloride **F** (2.0 equiv.) and NaOAc (2.0 equiv.) was added to a solution of ethyl acetoacetate **E** (1.0 equiv.) in ethanol (0.87 M). The reaction mixture was then refluxed for overnight under argon atmosphere. After completion of reaction, the mixture was diluted with DCM and washed with water and brine, dried over Na<sub>2</sub>SO<sub>4</sub>, and concentrated to give a yellow solid. The resulting compound was then washed with cold Et<sub>2</sub>O (3 x 50 mL) and dried in *vacuo* to afford **G** as white solid.

#### 2.3.2. Step 2: Synthesis of pyrazole-4,5-dione (**2**):

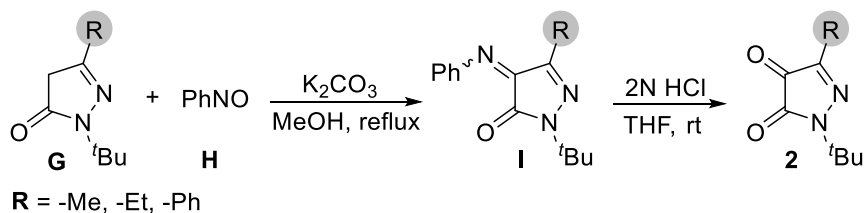

To a solution of pyrazolone **G** (1.0 equiv.) in MeOH (0.6 M) at room temperature were added Nitrosobenzene **H** (1.0 equiv.) and K<sub>2</sub>CO<sub>3</sub> (0.2 equiv.). The reaction mixture was then charged with reflux condenser and refluxed for 3 h. The solvent was removed under reduced pressure, and the residue was dissolved in ethyl acetate and washed three times with water, brine and dried over Na<sub>2</sub>SO<sub>4</sub>. After removing the solvent in vacuum, the crude product was purified by flash column chromatography to afford ketimine (**I**).

Ketimine **I** was then dissolved in THF (0.13 M), and an aqueous HCl (2.0 N) solution (25 mL) was added to it at room temperature. After completion of the reaction checked by TLC, the mixture was diluted with water and organic layer was extracted three times with DCM. The combined organic layers were dried over Na<sub>2</sub>SO<sub>4</sub>, solvent was removed in vacuum. The crude product was then purified by flash column chromatography to afford **2**.

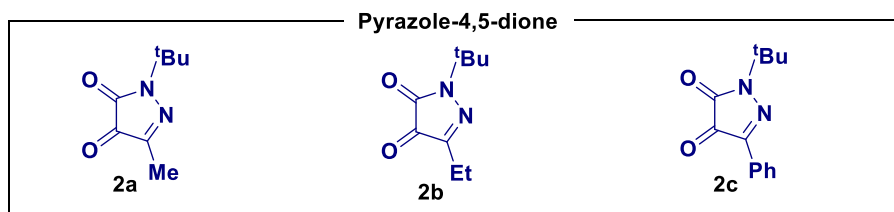

### 3. General procedure for asymmetric vinylogous aldol reaction of 3-alkylidene-2-oxindole with pyrazolones

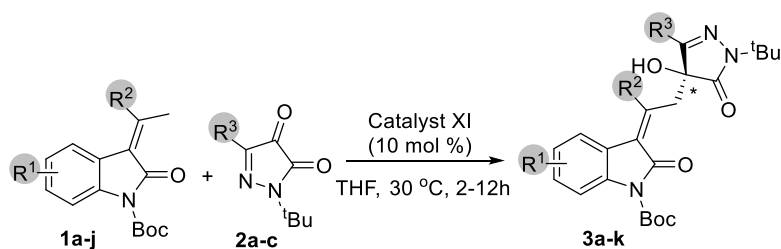

To a solution of catalyst **V**/**VI** (0.01mmol, 10 mol%) in THF (1.0 mL) was added pyrazole-4,5-dione (**2a-c**) (0.12 mmol). In the resulting homogenous mixture 3-alkylidene-2-oxindole (**1a-j**) (0.1 mmol) was added at room temperature and it was kept at rt until the completion of the reaction. The reaction mixture was directly processed for the purification by silica gel column chromatography (eluent: EtOAc/Petroleum ether = 3/10, v/v) without any workup. Racemic reaction were performed as racemic thiourea [1-(3,5-bis(trifluoromethyl)phenyl)-3-(2-(dimethylamino)ethyl)thiourea] (7.46 mg, 0.2equiv., 0.02 mmol) was added to a homogenous mixture 3-alkylidene-2-oxindole (0.1 mmol) and pyrazolone (0.12 mmol) in THF (1.0 ml) at room temperature until the reaction completion. Purification of the racemic adduct was done similar to chiral reaction condition.

### 4. General procedure for N-Boc deprotection of compound **3a**:

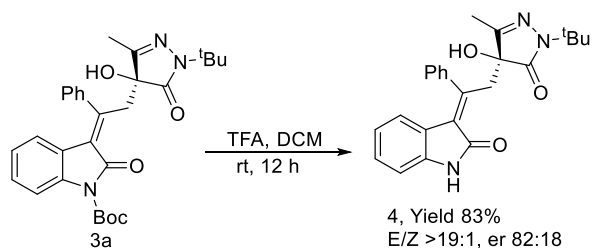

Compound **3a** (50.3 mg, 0.10 mmol, 1.0 equiv) was dissolved in anhydrous DCM (1.0 mL) and trifluoroacetic acid (TFA) (1.00mmol, 77  $\mu$ L, 10.0 equiv.) was added in the reaction mixture. The reaction mixture was then stirred at room temperature for 12 h. After completion of reaction checked by TLC, it was quenched with saturated  $\text{NaHCO}_3$ . The organic layer was separated and the aqueous layer was washed with DCM (3 x 3 mL). The combined organic layer was dried over  $\text{Na}_2\text{SO}_4$ , filtered and concentrated. The crude mixture was purified by

flash chromatography (silica gel, hexane/ethyl acetate = 70/30) to give the product as a yellow sticky solid.

### 5. General procedure for -O acylation of compound **3a**:

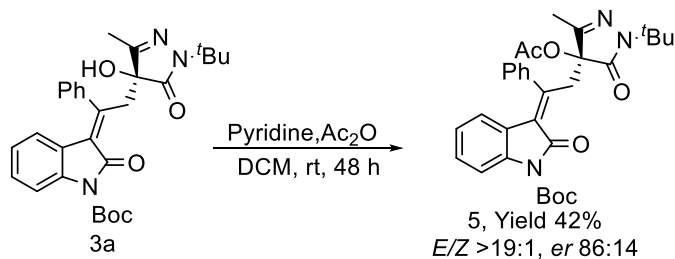

Compound **3a** (50.3 mg, 0.10 mmol, 1.0 equiv) was dissolved in anhydrous DCM (1.0 mL) and pyridine (0.1 mmol, 1.0 equiv.) was added in the reaction mixture followed by addition of acetic anhydride (0.15 mmol, 1.5 equiv.). The reaction mixture was then stirred at room temperature for 48 h. After completion of reaction checked by TLC and the reaction mixture was directly processed for the purification by silica gel column chromatography. The combined organic layer was dried over Na<sub>2</sub>SO<sub>4</sub>, filtered and concentrated. The crude mixture was purified by flash chromatography (silica gel, hexane/ethyl acetate = 93/7) to give the product as a yellow solid.

## 6. Crystal Structure of 5:

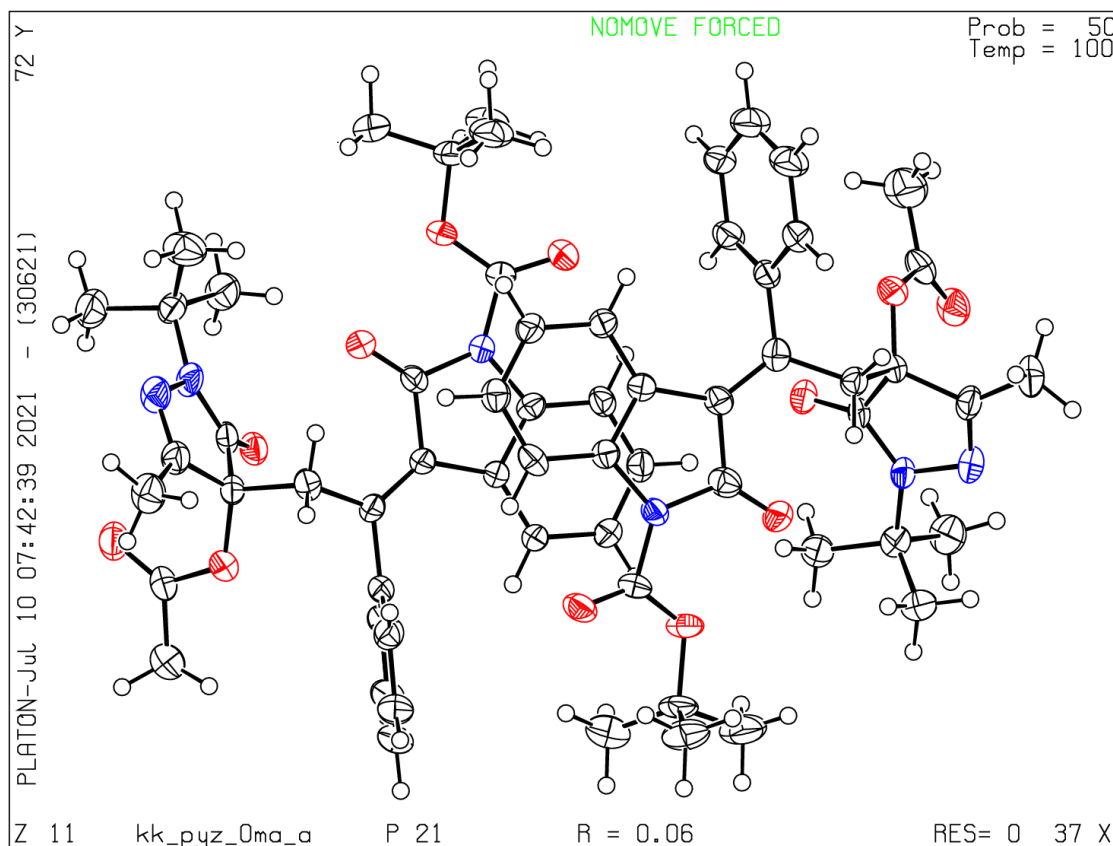

Bond precision:

C-C = 0.0086 Å

Wavelength=0.71073

Cell:

a=6.5527(6)

b=23.763(2)

c=22.007(2)

alpha=90

beta=90.081(3)

gamma=90

Temperature: 100 K

|                | Calculated                                                                | Reported                                                                  |
|----------------|---------------------------------------------------------------------------|---------------------------------------------------------------------------|
| Volume         | 3426.8(5)                                                                 | 3426.8(5)                                                                 |
| Space group    | P 21                                                                      | P 21                                                                      |
| Hall group     | P 2yb                                                                     | P 2yb                                                                     |
| Moiety formula | C <sub>31</sub> H <sub>35</sub> N <sub>3</sub> O <sub>6</sub> [+ solvent] | C <sub>31</sub> H <sub>35</sub> N <sub>3</sub> O <sub>6</sub> [+ solvent] |
| Sum formula    | C <sub>31</sub> H <sub>35</sub> N <sub>3</sub> O <sub>6</sub> [+ solvent] | C <sub>31</sub> H <sub>35</sub> N <sub>3</sub> O <sub>6</sub> [+ solvent] |

|                               |                                  |         |
|-------------------------------|----------------------------------|---------|
| Mr                            | 545.62                           | 545.62  |
| Dx,g cm-3                     | 1.058                            | 1.058   |
| Z                             | 4                                | 4       |
| Mu (mm-1)                     | 0.074                            | 0.074   |
| F000                          | 1160.0                           | 1160.0  |
| F000'                         | 1160.55                          |         |
| h,k,lmax                      | 7,28,26                          | 7,28,26 |
| Nref                          | 12073[ 6196]                     | 12073   |
| Tmin,Tmax                     | 0.984,0.988                      |         |
| Tmin'                         | 0.982                            |         |
| Correction method= Not given  |                                  |         |
| Data completeness= 1.95/1.00  | Theta(max)= 25.000               |         |
| R(reflections)= 0.0618( 7898) | wR2(reflections)= 0.1763( 12069) |         |
| S = 1.096                     | Npar= 738                        |         |



***tert*-Butyl (*E*)-3-(2-(1-(*tert*-butyl)-4-hydroxy-3-methyl-5-oxo-4,5-dihydro-1*H*-pyrazol-4-yl)-1-phenylethylidene)-2-oxoindoline-1-carboxylate (**3a**):**

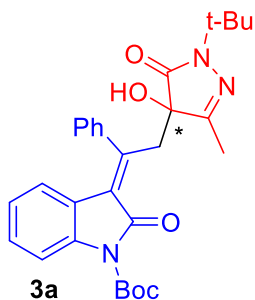

light yellow solid (48 mg, 95% yield). **R<sub>f</sub>** = 0.4 (ethyl acetate/petroleum ether = 3/7). **HPLC**: The *er* of the **3a** was determined to be 86:14 [determined by HPLC, Chiralpak IE, hexane: isopropanol = 90:10, 1mL/min,  $\lambda$  = 225 nm, t (major) = 8.051 min, t (minor) = 6.977 min]. **Optical Rotation**:  $[\alpha]^{D25} = +59.36^\circ$  (c 0.47, CHCl<sub>3</sub>). **<sup>1</sup>H NMR** (400 MHz, CDCl<sub>3</sub>):  $\delta$  7.79 (d, *J* = 8.2 Hz, 1H), 7.64 – 7.51 (m, 2H), 7.49-7.41 (m, 3H), 7.16 (t, *J* = 7.8 Hz, 1H), 6.71 (t, *J* = 7.7 Hz, 1H), 6.18 (d, *J* = 7.8 Hz, 1H), 4.10 (d, *J* = 13.1 Hz, 1H), 3.29 (d, *J* = 13.2 Hz, 1H), 3.12 (s, 1H), 2.02 (s, 3H), 1.64 (s, 9H), 1.41 (s, 9H). **<sup>13</sup>C NMR** (100 MHz, CDCl<sub>3</sub>):  $\delta$  173.1, 166.2, 158.0, 151.3, 149.3, 141.6, 138.8, 129.6, 129.5, 129.4, 129.1, 127.8, 126.1, 123.4, 123.0, 122.8, 114.5, 84.2, 80.6, 57.2, 40.7, 28.1, 27.9, 13.0. **HRMS ESI**: [M+Na]<sup>+</sup>, Calcd for C<sub>29</sub>H<sub>33</sub>N<sub>3</sub>NaO<sub>5</sub>: 526.2318; found 526.2301.

***tert*-Butyl (*E*)-3-(2-(1-(*tert*-butyl)-3-ethyl-4-hydroxy-5-oxo-4,5-dihydro-1*H*-pyrazol-4-yl)-1-phenylethylidene)-2-oxoindoline-1-carboxylate (**3b** & **3b'**):**

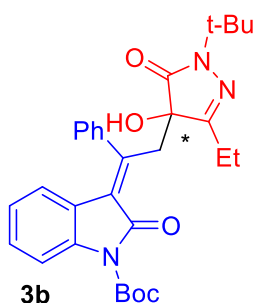

light yellow solid (49 mg, 95% yield). **R<sub>f</sub>** = 0.6 (ethyl acetate/petroleum ether = 3/7). **HPLC**: The *er* of the **3b** (**Catalyst V**) was determined to be 78:22 [determined by HPLC, Chiralpak IE, hexane: isopropanol = 95:5, 1mL/min,  $\lambda$  = 225 nm, t (major) = 22.40 min, t (minor) = 16.37 min] and **3b'** (**Catalyst VI**) was determined to be 75:25 [determined by HPLC, Chiralpak IE, hexane: isopropanol = 95:5, 1mL/min,  $\lambda$  = 225 nm, t (major) = 16.09 min, t (minor) = 22.71 min]. **Optical Rotation**:  $[\alpha]^{D25} = +50.20^\circ$  (c 0.49, CHCl<sub>3</sub>). **<sup>1</sup>H NMR** (400 MHz, CDCl<sub>3</sub>):  $\delta$  7.78 (d, *J* = 8.2 Hz, 1H), 7.66 – 7.50 (m, 2H), 7.48-7.40 (m, 3H), 7.15 (t, *J* = 8 Hz, 1H), 6.70 (t, *J* = 7.5 Hz, 1H), 6.16 (d, *J* = 7.8 Hz, 1H), 4.11 (d, *J* = 13.1 Hz, 1H), 3.29 (d, *J* = 13.2 Hz, 1H), 3.03 (s, 1H), 2.39 (m, 2H), 1.64 (s, 9H), 1.42 (s, 9H), 1.19 (t, *J* = 7.4 Hz, 3H). **<sup>13</sup>C NMR** (100 MHz, CDCl<sub>3</sub>):  $\delta$  173.3, 166.2, 161.6, 151.5, 149.3, 141.6, 138.7, 129.6, 129.5, 129.3, 129.0, 127.8, 126.0, 123.4, 123.0, 122.8, 114.5, 84.2, 80.9, 77.2, 57.3, 40.9, 28.1, 27.9, 20.7, 9.3. **HRMS ESI**: [M+Na]<sup>+</sup>, Calcd for C<sub>30</sub>H<sub>35</sub>N<sub>3</sub>KO<sub>5</sub>: 556.2214; found 556.2289.

***tert*-Butyl (*E*)-3-(2-(1-(*tert*-butyl)-4-hydroxy-5-oxo-3-phenyl-4,5-dihydro-1*H*-pyrazol-4-yl)-1-phenylethylidene)-2-oxoindoline-1-carboxylate (**3c** & **3c'**):**

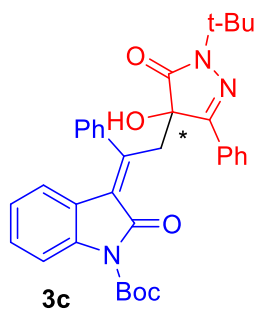

light yellow solid (52 mg, 92% yield).  $R_f = 0.6$  (ethyl acetate/petroleum ether = 3/7). **HPLC:** The *er* of the **3c** (**Catalyst V**) was determined to be 65:35 [determined by HPLC, Chiralpak IE, hexane: isopropanol = 95:5, 1mL/min,  $\lambda = 225$  nm,  $t$  (major) = 29.14 min,  $t$  (minor) = 17.02 min] and **3c'** (**Catalyst VI**) was determined to be 62:38 [determined by HPLC, Chiralpak IE, hexane: isopropanol = 95:5, 1mL/min,  $\lambda = 225$  nm,  $t$  (major) = 16.49 min,  $t$  (minor) = 28.49 min]. **Optical Rotation:**  $[\alpha]^{D25} = +56.73^\circ$  (c 0.52,  $\text{CHCl}_3$ ).  **$^1\text{H NMR}$**  (400 MHz,  $\text{CDCl}_3$ ):  $\delta$  8.01 – 7.92 (m, 2H), 7.81 (d,  $J = 8.1$  Hz, 1H), 7.68 – 7.56 (m, 2H), 7.56 – 7.43 (m, 3H), 7.42 – 7.36 (m, 3H), 7.18 (t,  $J = 8.1$  Hz, 1H), 6.73 (t,  $J = 8.2$  Hz, 1H), 6.63 (d,  $J = 8.2$  Hz, 1H), 6.20 (d,  $J = 7.6$  Hz, 1H), 4.29 (d,  $J = 13.5$  Hz, 1H), 3.54 (d,  $J = 13.5$  Hz, 1H), 3.33 (bs, 1H), 1.67 (s, 9H), 1.55 (s, 9H);  **$^{13}\text{C NMR}$**  (100 MHz,  $\text{CDCl}_3$ ):  $\delta$  173.4, 166.0, 155.3, 151.2, 149.3, 141.8, 138.7, 130.4, 129.8, 129.7, 129.5, 129.3, 129.0, 128.6, 128.0, 127.8, 126.7, 126.1, 123.4, 123.0, 122.8, 114.5, 84.1, 81.2, 58.0, 42.1, 28.2, 28.0. **HRMS ESI:**  $[\text{M}+\text{Na}]^+$ , Calcd for  $\text{C}_{34}\text{H}_{35}\text{N}_3\text{NaO}_5$ : 588.2474; found 588.2521.

**tert-Butyl (E)-3-(2-(1-(tert-butyl)-4-hydroxy-3-methyl-5-oxo-4,5-dihydro-1H-pyrazol-4-yl)-1-phenylethylidene)-5-methoxy-2-oxoindoline-1-carboxylate (3d):**

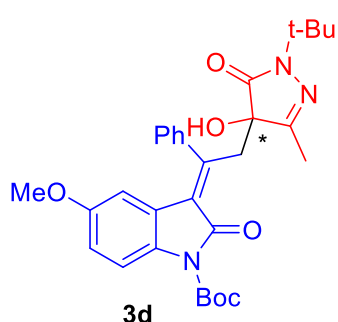

light yellow solid (52 mg, 98% yield).  $R_f = 0.5$  (ethyl acetate/petroleum ether = 3/7). **HPLC:** The *er* of the **3d** was determined to be 81:19 [determined by HPLC, Chiralpak ID, hexane: isopropanol = 95:5, 0.75mL/min,  $\lambda = 225$  nm,  $t$  (major) = 20.31 min,  $t$  (minor) = 18.20 min]. **Optical Rotation:**  $[\alpha]^{D25} = +79.80^\circ$  (c 0.52,  $\text{CHCl}_3$ ).  **$^1\text{H NMR}$**  (400 MHz,  $\text{CDCl}_3$ ):  $\delta$  7.69 (d,  $J = 9.0$  Hz, 1H), 7.64 – 7.50 (m, 2H), 7.50 – 7.39 (m, 3H), 6.70 (dd,  $J = 9.0, 2.7$  Hz, 1H), 5.70 (d,  $J = 2.6$  Hz, 1H), 4.05 (d,  $J = 13.1$  Hz, 1H), 3.35 (s, 3H), 3.31 (d,  $J = 13.1$  Hz, 1H), 2.01 (s, 3H), 1.62 (s, 9H), 1.39 (s, 9H).  **$^{13}\text{C NMR}$**  (100 MHz,  $\text{CDCl}_3$ ):  $\delta$  173.2, 166.4, 158.2, 155.6, 151.5, 149.3, 141.4, 132.6, 129.6, 129.4, 129.3, 128.0, 127.9, 126.4, 123.6, 115.5, 115.5, 107.9, 84.0, 80.6, 57.2, 55.0, 40.6, 28.1, 27.9, 25.3, 13.0. **HRMS ESI:**  $[\text{M}+\text{Na}]^+$ , Calcd for  $\text{C}_{30}\text{H}_{34}\text{N}_3\text{O}_6$ : 534.2604; found 534.2632.

**tert-Butyl (E)-3-(2-(1-(tert-butyl)-4-hydroxy-3-methyl-5-oxo-4,5-dihydro-1H-pyrazol-4-yl)-1-phenylethylidene)-5-chloro-2-oxoindoline-1-carboxylate (3e):**

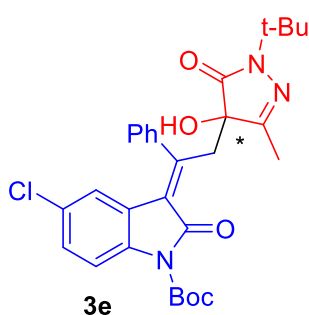

light yellow solid, (50 mg, 94% yield). **R<sub>f</sub>** = 0.6 (ethyl acetate/petroleum ether = 3/7). **HPLC:** The *er* of the **3e** was determined to be 81:19 [determined by HPLC, Chiralpak IE, hexane: isopropanol = 95:5, 1mL/min,  $\lambda$  = 225 nm, t (major) = 14.06 min, t (minor) = 12.35 min]. **Optical Rotation:**  $[\alpha]^{D25}$  (**3e**) = +61.40° (c 0.5, CHCl<sub>3</sub>). **<sup>1</sup>H NMR** (400 MHz, CDCl<sub>3</sub>):  $\delta$  7.78 (d, *J* = 8.7 Hz, 1H), 7.62 (m, 2H), 7.54 (m, 2H), 7.42 (d, *J* = 7.2 Hz, 1H), 7.15 (dd, *J* = 8.8, 2.2 Hz, 1H), 6.08 (d, *J* = 2.1 Hz, 1H), 4.17 (d, *J* = 13.0 Hz, 1H), 3.25 (d, *J* = 13.1 Hz, 1H), 2.88 (s, 1H), 2.04 (s, 3H), 1.65 (s, 9H), 1.45 (s, 9H). **<sup>13</sup>C NMR** (100 MHz, CDCl<sub>3</sub>):  $\delta$  173.0, 165.4, 158.0, 153.2, 149.2, 141.0, 137.1, 129.9, 129.8, 129.6, 128.9, 128.7, 127.6, 127.5, 125.2, 124.2, 123.0, 115.7, 84.5, 80.5, 57.3, 40.5, 28.1, 27.9, 13.0. **HRMS ESI:** [M+Na]<sup>+</sup>, Calcd for C<sub>29</sub>H<sub>33</sub>N<sub>3</sub>O<sub>5</sub>Cl: 538.2109; found 538.2098.

**tert-Butyl (E)-5-bromo-3-(2-(1-(tert-butyl)-4-hydroxy-3-methyl-5-oxo-4,5-dihydro-1H-pyrazol-4-yl)-1-phenylethylidene)-2-oxoindoline-1-carboxylate (3f):**

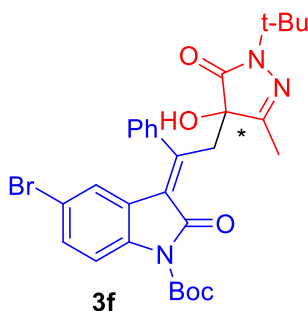

light yellow sticky (53 mg, 92% yield). **R<sub>f</sub>** = 0.6 (ethyl acetate/petroleum ether = 3/7). **HPLC:** The *er* of the **3f** was determined to be 67:33 [determined by HPLC, Chiralpak IB, hexane: isopropanol = 95:5, 1mL/min,  $\lambda$  = 225 nm, t (major) = 7.39 min, t (minor) = 5.75 min]. **Optical Rotation:**  $[\alpha]^{D25}$  = +20.28° (c 0.53, CHCl<sub>3</sub>). **<sup>1</sup>H NMR** (400 MHz, CDCl<sub>3</sub>):  $\delta$  7.70 (d, *J* = 8.7 Hz, 1H), 7.57 (d, *J* = 11.3 Hz, 2H), 7.55 – 7.45 (m, 2H), 7.38 (d, *J* = 7.2 Hz, 1H), 7.26 (dd, *J* = 8.6, 2.1 Hz, 1H), 6.18 (d, *J* = 1.9 Hz, 1H), 4.15 (d, *J* = 13.1 Hz, 1H), 3.22 (d, *J* = 13.1 Hz, 1H), 2.94 (bs, 1H), 2.00 (s, 3H), 1.62 (s, 9H), 1.41 (s, 9H). **<sup>13</sup>C NMR** (100 MHz, CDCl<sub>3</sub>):  $\delta$  172.9, 165.3, 158.0, 153.3, 149.1, 141.0, 137.6, 131.6, 129.8, 129.8, 129.6, 127.6, 127.5, 125.9, 125.1, 124.6, 116.5, 116.1, 84.5, 80.5, 57.3, 40.5, 28.1, 27.9, 13.0. **HRMS ESI:** [M+Na]<sup>+</sup>, Calcd for C<sub>29</sub>H<sub>32</sub>N<sub>3</sub>NaO<sub>5</sub>Br: 604.1423; found 604.1471.

**tert-Butyl (E)-3-(2-(1-(tert-butyl)-4-hydroxy-3-methyl-5-oxo-4,5-dihydro-1H-pyrazol-4-yl)-1-(p-tolyl)ethylidene)-2-oxoindoline-1-carboxylate (3g):**

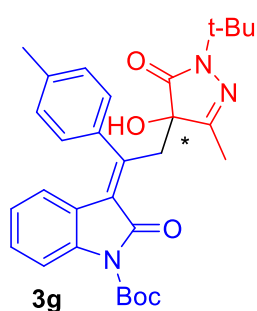

light yellow sticky (51 mg, 98% yield).  $R_f$  = 0.5 (ethyl acetate/petroleum ether = 3/7). **HPLC:** The *er* of the **3g** was determined to be 78:22 [determined by HPLC, Chiralpak IE, hexane: isopropanol = 80:20, 1mL/min,  $\lambda$  = 225 nm, *t* (major) = 9.12 min, *t* (minor) = 7.71 min]. **Optical Rotation:**  $[\alpha]^{D_{25}}$  (**3g**) = +53.60° (c 0.5, CHCl<sub>3</sub>). **<sup>1</sup>H NMR** (400 MHz, CDCl<sub>3</sub>):  $\delta$  7.79 (d, *J* = 8.2 Hz, 1H), 7.48 (d, *J* = 6.7 Hz, 1H), 7.29 (dd, *J* = 27.0, 8.6 Hz, 3H), 7.21 – 7.11 (m, 1H), 6.73 (t, *J* = 7.7 Hz, 1H), 6.30 (d, *J* = 7.8 Hz, 1H), 4.13 (d, *J* = 13.1 Hz, 1H), 3.24 (d, *J* = 13.2 Hz, 1H), 2.43 (s, 3H), 2.00 (s, 3H), 1.64 (s, 9H), 1.41 (s, 9H). **<sup>13</sup>C NMR** (100 MHz, CDCl<sub>3</sub>):  $\delta$  173.2, 166.2, 158.1, 151.6, 149.3, 139.6, 138.6, 138.4, 130.3, 130.2, 128.9, 127.9, 125.8, 123.4, 123.0, 122.9, 114.5, 84.1, 80.5, 60.4, 57.2, 40.6, 28.1, 27.9, 21.4, 14.2, 13.0. **HRMS ESI:**  $[M+Na]^+$ , Calcd for C<sub>30</sub>H<sub>36</sub>N<sub>3</sub>O<sub>5</sub>: 518.2655; found 518.2623.

***tert*-Butyl (*E*)-3-(2-(1-(*tert*-butyl)-4-hydroxy-3-methyl-5-oxo-4,5-dihydro-1*H*-pyrazol-4-yl)-1-(4-methoxyphenyl)ethylidene)-2-oxoindoline-1-carboxylate (**3h**):**

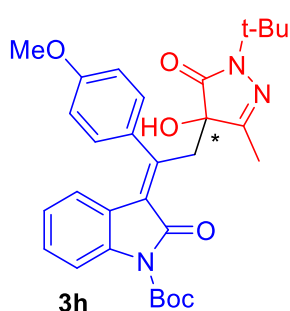

light yellow sticky (52 mg, 97% yield).  $R_f$  = 0.5 (ethyl acetate/petroleum ether = 3/7). **HPLC:** The *er* of the **3h** was determined to be 71:29 [determined by HPLC, Chiralpak IE, hexane: isopropanol = 95:5, 1mL/min,  $\lambda$  = 225 nm, *t* (major) = 48.46 min, *t* (minor) = 33.49 min]. **Optical Rotation:**  $[\alpha]^{D_{25}}$  (**3h**) = +45.57° (c 0.52, CHCl<sub>3</sub>). **<sup>1</sup>H NMR** (400 MHz, CDCl<sub>3</sub>):  $\delta$  7.78 (dd, *J* = 7.7, 2.5 Hz, 1H), 7.48 (s, 1H), 7.35 (s, 1H), 7.20– 7.09 (m, 1H), 7.07 – 6.86 (m, 2H), 6.79 – 6.68 (m, 1H), 6.43 – 6.32 (m, 1H), 4.08 (d, *J* = 13.2 Hz, 1H), 3.87 (s, 3H), 3.38 (bs, 1H), 3.28 (d, *J* = 13.2 Hz, 1H), 1.99 (s, 3H), 1.62 (s, 9H), 1.39 (s, 9H). **<sup>13</sup>C NMR** (100 MHz, CDCl<sub>3</sub>):  $\delta$  173.3, 166.4, 160.6, 158.2, 151.6, 149.3, 138.5, 133.2, 129.8, 128.9, 125.7, 123.4, 123.1, 122.7, 114.8, 114.5, 84.2, 80.5, 57.2, 55.4, 40.6, 28.1, 27.9, 13.0. **HRMS ESI:**  $[M+Na]^+$ , Calcd for for C<sub>30</sub>H<sub>33</sub>N<sub>3</sub>NaO<sub>6</sub>: 556.2424; found 556.2591.

***tert*-Butyl (*E*)-3-(2-(1-(*tert*-butyl)-4-hydroxy-3-methyl-5-oxo-4,5-dihydro-1*H*-pyrazol-4-yl)-1-(4-chlorophenyl)ethylidene)-2-oxoindoline-1-carboxylate (**3i**):**

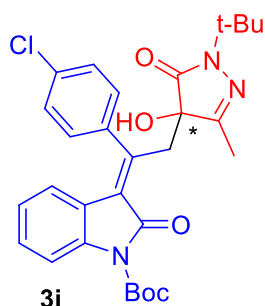

give light yellow sticky (53 mg, 98% yield).  $R_f$  = 0.5 (ethyl acetate/petroleum ether = 3/7). **HPLC:** The *er* of the **3i** was determined to be 78:22 [determined by HPLC, Chiralpak IE, hexane: isopropanol = 95:5, 1mL/min,  $\lambda$  = 225 nm, *t* (major) = 7.95 min, *t* (minor) = 6.88 min]. **Optical Rotation:**  $[\alpha]^{D25}$  (**3i**) = +85.19° (c 0.52, CHCl<sub>3</sub>). **<sup>1</sup>H NMR** (400 MHz, CDCl<sub>3</sub>):  $\delta$  7.78 (d, *J* = 8.2 Hz, 1H), 7.57 – 7.54 (m, 2H), 7.44 – 7.30 (m, 2H), 7.18 (t, *J* = 8.1 Hz, 1H), 6.75 (t, *J* = 7.4 Hz, 1H), 6.24 (d, *J* = 7.9 Hz, 1H), 4.03 (d, *J* = 13.2 Hz, 1H), 3.26 (d, *J* = 13.2 Hz, 1H), 2.01 (s, 3H), 1.63 (s, 9H), 1.39 (s, 9H). **<sup>13</sup>C NMR** (100 MHz, CDCl<sub>3</sub>):  $\delta$  173.1, 166.1, 158.3, 149.9, 149.2, 139.8, 138.8, 135.3, 129.8, 129.6, 129.3, 126.4, 123.6, 122.9, 122.5, 114.7, 84.4, 80.5, 57.3, 40.4, 28.1, 27.9, 25.3, 13.0. **HRMS ESI:**  $[M+Na]^+$ , Calcd for C<sub>29</sub>H<sub>33</sub>N<sub>3</sub>O<sub>5</sub>Cl: 538.2109; found 538.2091.

**tert-Butyl (E)-3-(1-(4-bromophenyl)-2-(1-(tert-butyl)-4-hydroxy-3-methyl-5-oxo-4,5-dihydro-1H-pyrazol-4-yl)ethylidene)-2-oxoindoline-1-carboxylate (3j):**

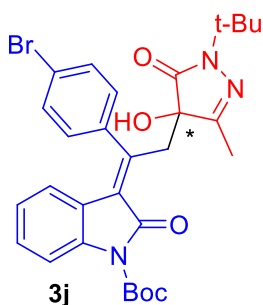

light yellow sticky (56 mg, 96% yield).  $R_f$  = 0.6 (ethyl acetate/petroleum ether = 3/7). **HPLC:** The *er* of the **3j** was determined to be 83:17 [determined by HPLC, Chiralpak IE, hexane: isopropanol = 95:5, 1mL/min,  $\lambda$  = 225 nm, *t* (major) = 13.10 min, *t* (minor) = 10.66 min]. **Optical Rotation:**  $[\alpha]^{D25}$  (**3j**) = +97.30° (c 0.52, CHCl<sub>3</sub>). **<sup>1</sup>H NMR** (400 MHz, CDCl<sub>3</sub>):  $\delta$  7.78 (d, *J* = 8.2 Hz, 1H), 7.69 – 7.39 (m, 3H), 7.26 (s, 1H), 7.17 (t, *J* = 7.9 Hz, 1H), 6.75 (t, *J* = 7.7 Hz, 1H), 6.24 (d, *J* = 7.8 Hz, 1H), 4.07 (dd, *J* = 13.5, 4.6 Hz, 1H), 3.23 (d, *J* = 13.2 Hz, 1H), 2.00 (s, 3H), 1.62 (s, 9H), 1.38 (s, 9H). **<sup>13</sup>C NMR** (100 MHz, CDCl<sub>3</sub>):  $\delta$  173.2, 166.1, 149.8, 149.2, 140.3, 138.8, 132.7, 132.5, 129.9, 129.7, 126.3, 123.6, 123.5, 122.9, 122.5, 114.7, 84.3, 64.4, 57.3, 40.3, 28.1, 27.9, 25.3, 13.0. **HRMS ESI:**  $[M+Na]^+$ , Calcd for C<sub>29</sub>H<sub>33</sub>N<sub>3</sub>O<sub>5</sub>Br: 582.1604; found 582.1588.

**tert-Butyl (E)-3-(2-(1-(tert-butyl)-4-hydroxy-3-methyl-5-oxo-4,5-dihydro-1H-pyrazol-4-yl)-1-(thiophen-2-yl)ethylidene)-2-oxoindoline-1-carboxylate (3k):**

light yellow sticky (46 mg, 90% yield).  $R_f$  = 0.5 (ethyl acetate/petroleum ether = 3/7); **HPLC:** The *er* of the **3k** was determined to be 78:22 [determined by HPLC, Chiralpak AD-H,

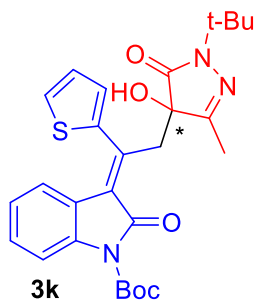

hexane: isopropanol = 95:5, 1mL/min,  $\lambda = 225$  nm,  $t$  (major) = 10.41 min,  $t$  (minor) = 8.00 min]. **Optical Rotation:**  $[\alpha]^{25}$  (**3k**) = +116.30° (c 0.46, CHCl<sub>3</sub>). **<sup>1</sup>H NMR** (400 MHz, CDCl<sub>3</sub>):  $\delta$  7.79 (d,  $J = 8.2$  Hz, 1H), 7.55 (dd,  $J = 4.1, 0.9$  Hz, 1H), 7.41 – 7.32 (m, 1H), 7.19 (t,  $J = 7.8$  Hz, 1H), 7.17 – 7.10 (m, 1H), 6.81 (t,  $J = 7.7$  Hz, 1H), 6.69 (d,  $J = 7.9$  Hz, 1H), 3.96 (d,  $J = 13.4$  Hz, 1H), 3.73 (bs, 1H), 3.31 (d,  $J = 13.4$  Hz, 1H), 2.00 (s, 3H), 1.62 (s, 9H), 1.42 (s, 9H). **<sup>13</sup>C NMR** (100 MHz, CDCl<sub>3</sub>):  $\delta$  173.3, 166.2, 158.2, 149.1, 143.7, 142.7, 138.8, 129.5, 129.1, 129.0, 128.2, 127.6, 123.6, 122.7, 122.6, 114.7, 84.4, 80.4, 28.1, 27.9, 25.3, 13.0. **HRMS ESI:**  $[M+Na]^+$ , Calcd for C<sub>27</sub>H<sub>31</sub>N<sub>3</sub>NaO<sub>5</sub>S: 532.1882; found 532.2579

**(E)-3-(2-(1-(tert-Butyl)-4-hydroxy-3-methyl-5-oxo-4,5-dihydro-1H-pyrazol-4-yl)-1-**

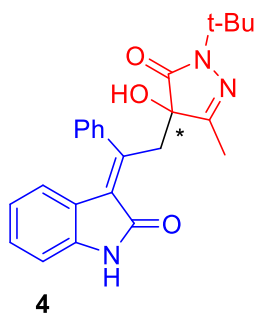

**phenylethylidene)indolin-2-one (4):** light yellow sticky (33 mg, 83% yield). **R<sub>f</sub>** = 0.4 (ethyl acetate/petroleum ether = 4/6); **HPLC:** The *er* of the **3k** was determined to be 82:18 [determined by HPLC, Chiralpak ID, hexane: isopropanol = 70:30, 1mL/min,  $\lambda = 225$  nm,  $t$  (major) = 12.12 min,  $t$  (minor) = 6.24 min]. **<sup>1</sup>H NMR** (400 MHz, CDCl<sub>3</sub>):  $\delta$  9.37 (s, 1H), 7.53 (s, 1H), 7.46 (s, 3H), 7.39 (s, 1H), 7.07 (t,  $J = 7.6$  Hz, 1H), 6.93 – 6.85 (m, 1H), 6.58 (t, 1H), 6.25 – 6.14 (m, 1H), 5.70 (s, 1H), 3.88 (dd,  $J = 13.3, 5.3$  Hz, 1H), 3.56 (dd,  $J = 13.3, 5.1$  Hz, 1H), 2.03 (s, 3H), 1.34 (s, 9H). **<sup>13</sup>C NMR** (100 MHz, CDCl<sub>3</sub>):  $\delta$  174.8, 171.0, 160.1, 151.2, 141.0, 140.1, 129.3, 129.1, 128.4, 127.8, 123.4, 123.1, 121.9, 110.2, 81.3, 57.1, 41.1, 29.8, 27.9, 13.3.

**tert-butyl (E)-3-(2-(4-acetoxy-1-(tert-butyl)-3-methyl-5-oxo-4,5-dihydro-1H-pyrazol-4-**

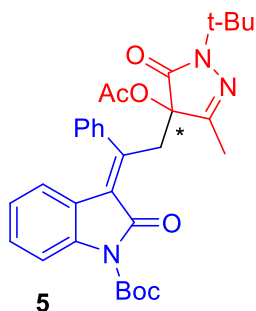

**yl)-1-phenylethylidene)-2-oxoindoline-1-carboxylate (5):** light yellow (23 mg, 42% yield). **R<sub>f</sub>** = 0.4 (ethyl acetate/petroleum ether = 1/10); **HPLC:** The *er* of the **5** was determined to be 86:14 [determined by HPLC, Chiralpak IE, hexane: isopropanol = 97:03, 0.5mL/min,  $\lambda = 225$  nm,  $t$  (major) = 19.78 min,  $t$  (minor) = 16.41 min]. **<sup>1</sup>H NMR** (500 MHz, CDCl<sub>3</sub>)  $\delta$  7.74 (d,  $J = 8.2$  Hz, 1H), 7.60 (d,  $J = 6.9$  Hz, 1H), 7.46 (t,  $J = 7.2$  Hz, 1H), 7.40 – 7.33 (m, 2H), 7.19 (s, 1H), 7.08 (t,  $J = 7.9$  Hz, 1H), 6.62 (t,  $J = 7.7$  Hz, 1H), 6.07 (d,  $J = 7.9$  Hz, 1H), 4.46 (d,  $J = 13.3$  Hz, 1H), 2.94 (d,  $J = 13.3$  Hz, 1H), 1.84 (s, 3H), 1.56 (s, 9H), 1.51 (s, 3H), 1.43 (s, 9H). **<sup>13</sup>C NMR** (126 MHz, CDCl<sub>3</sub>)  $\delta$  169.5, 168.3, 165.3, 153.0, 149.8, 149.5, 142.0, 138.9, 129.4, 129.0, 128.5, 128.4, 126.3, 126.1, 123.3, 122.9, 114.5, 83.96, 82.8, 57.6, 36.9, 28.2, 27.8, 19.7, 13.0.

## 5. References:

1. (a) C. Cassani, R. Martín-Rapún, E. Arceo, F. Bravo and P. Melchiorre, *Nature Protocols*, 2013, **8**, 325–344; (b) J. P. Malerich, K. Hagihara and V. H. Rawal, *J. Am. Chem. Soc.*, 2008, **130**, 14416–14417; (c) T. Sekikawa, T. Kitaguchi, H. Kitaura, T. Minami and Y. Hatanaka, *Org. Lett.*, 2015, **17**, 3026–3029. (d) L. Roiser and M. Waser, *Org. Lett.*, 2017, **19**, 2338–2341.
2. Y. Liu, Y. Yang, Y. Huang, X.-H. Xu and F.-L. Qing, *Synlett*, 2015, **26**, 67-72.
3. (a) J. P. Phelan and J. A. Ellman, *Adv. Synth. Catal.*, 2016, **358**, 1713–1718; (b) P. Chauhan, S. Mahajan, U. Kaya, A. Peuronen, K. Rissanen and D. Enders, *J. Org. Chem.*, 2017, **82**, 7050–7058.

## 6. Copies of $^1\text{H}$ , $^{13}\text{C}$ and HPLC spectra

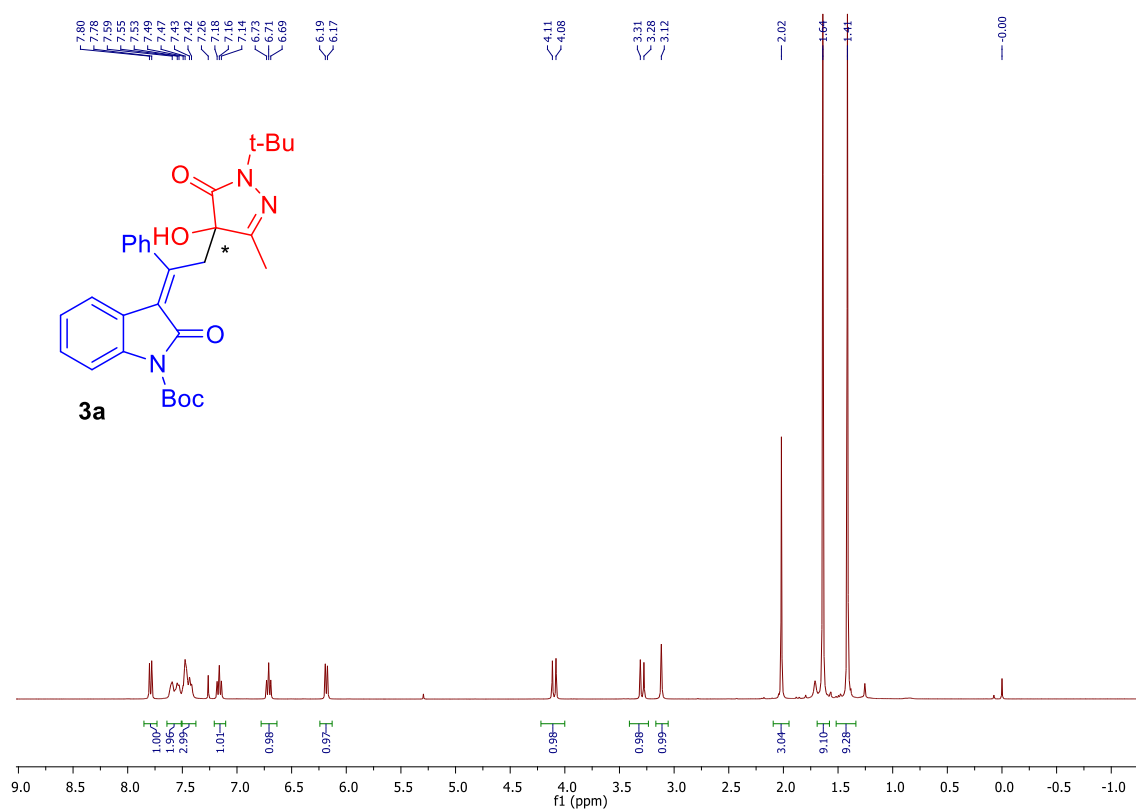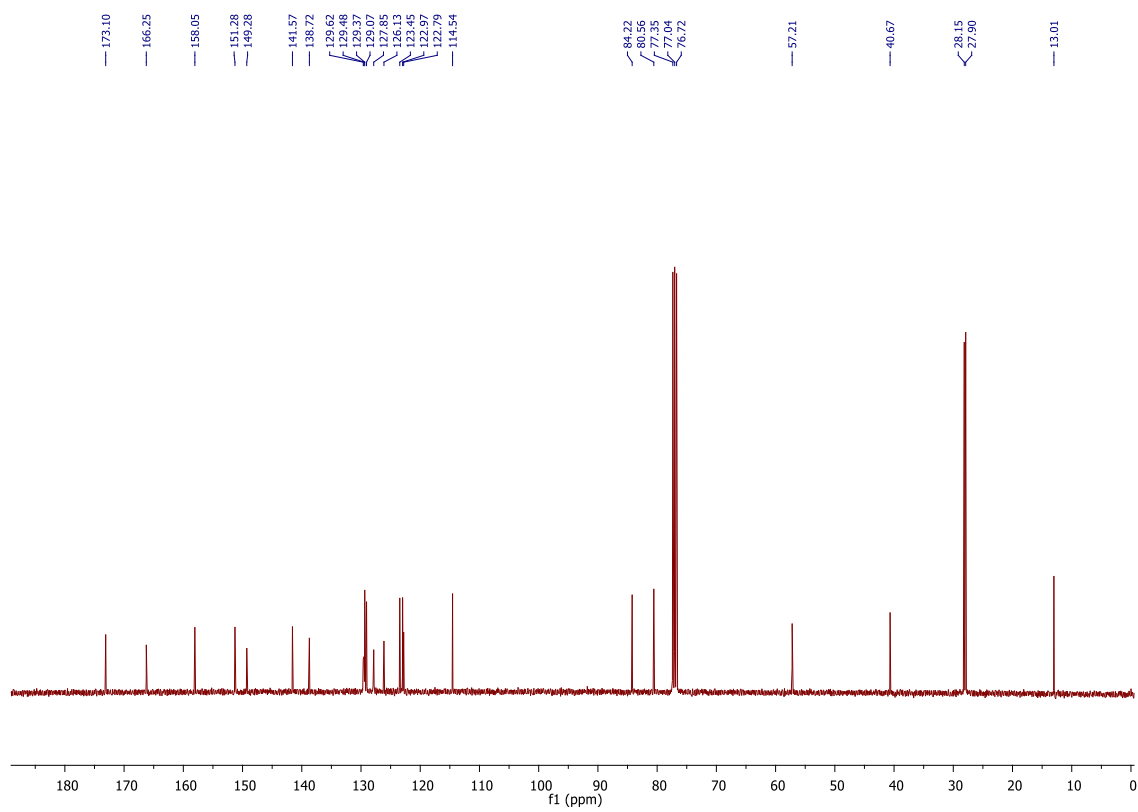





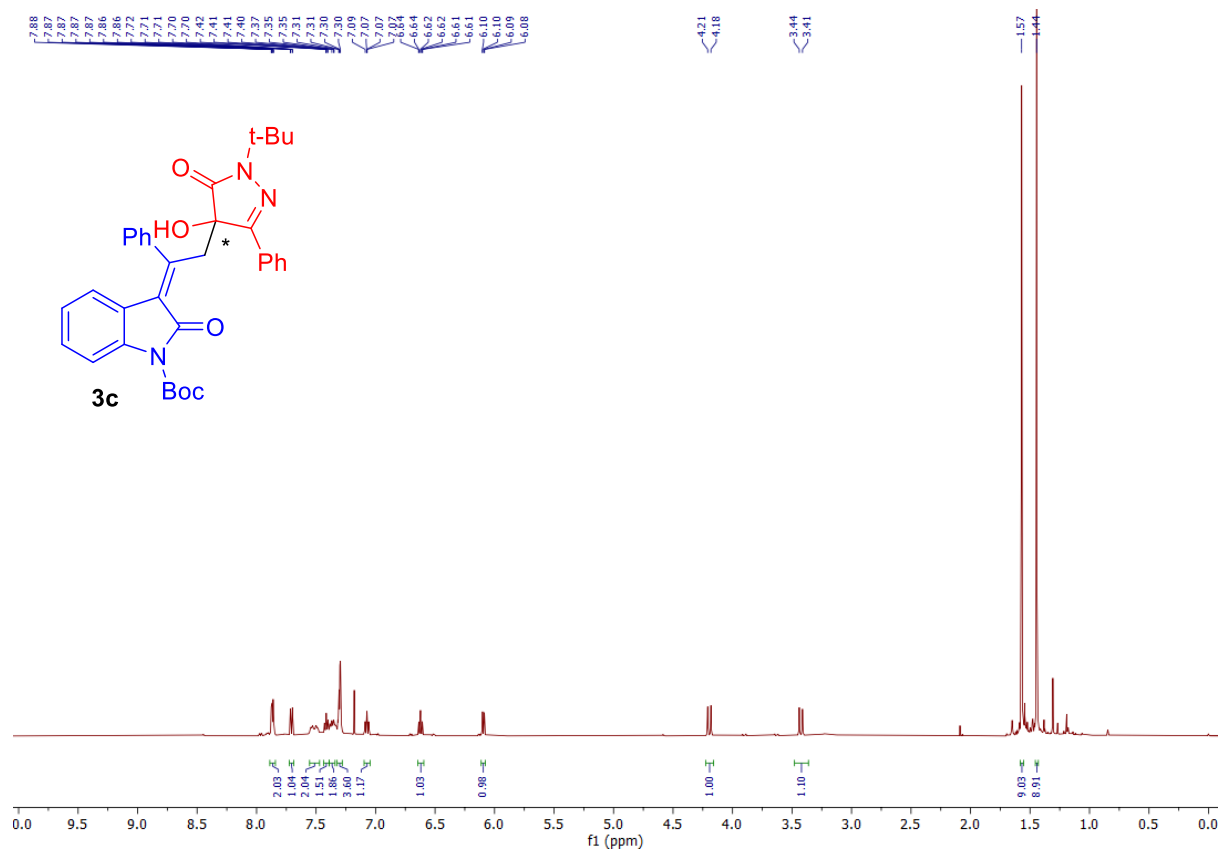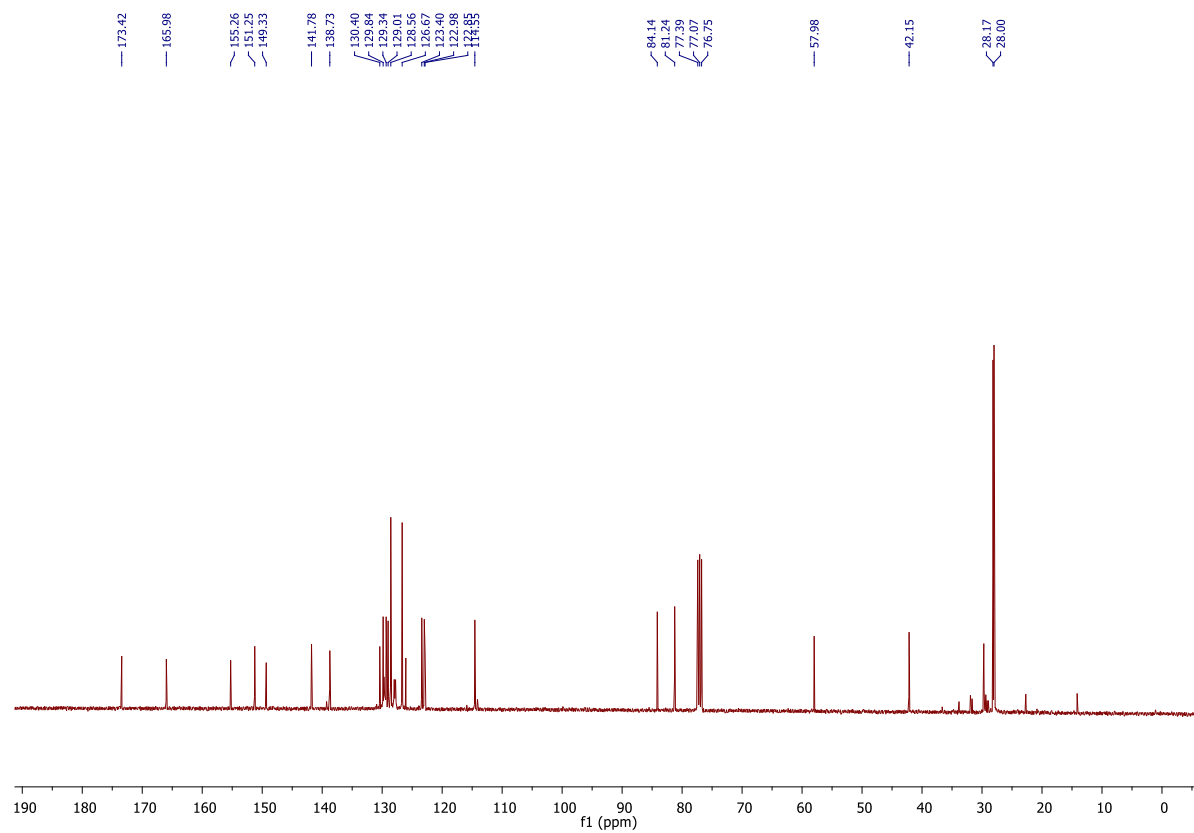

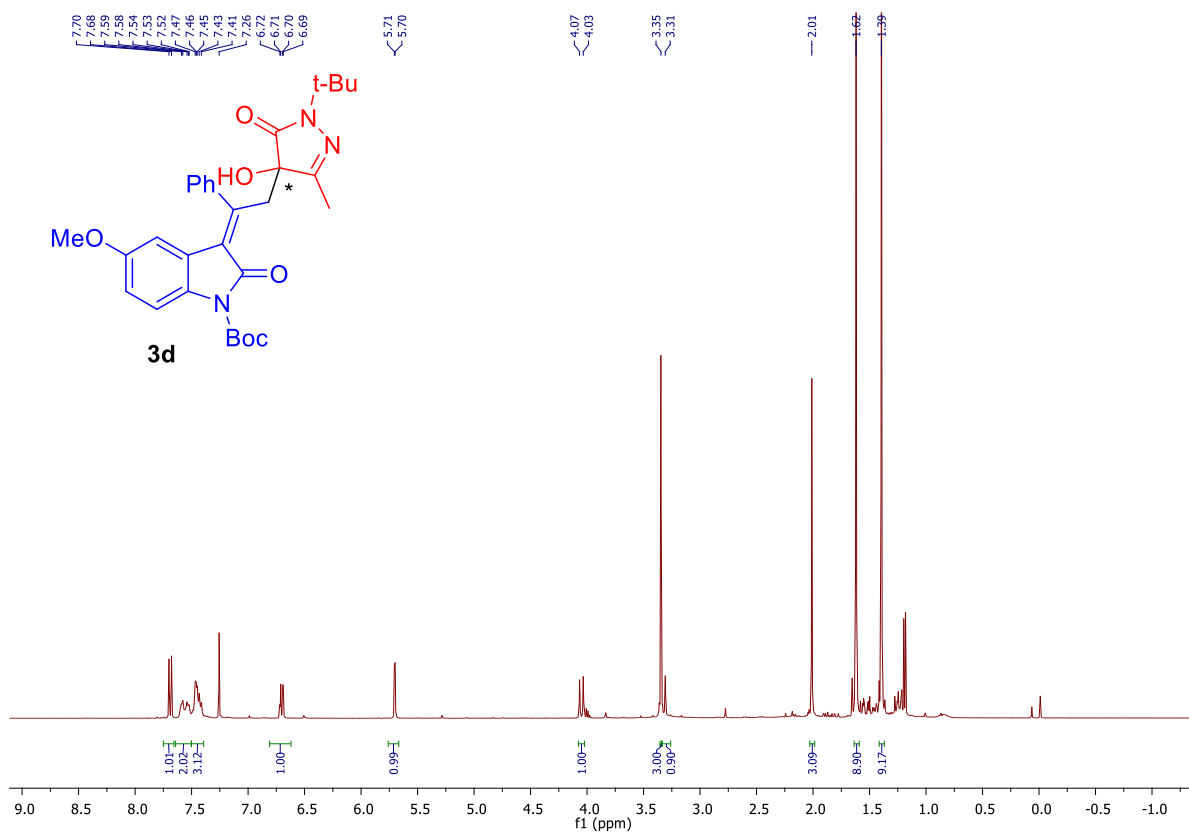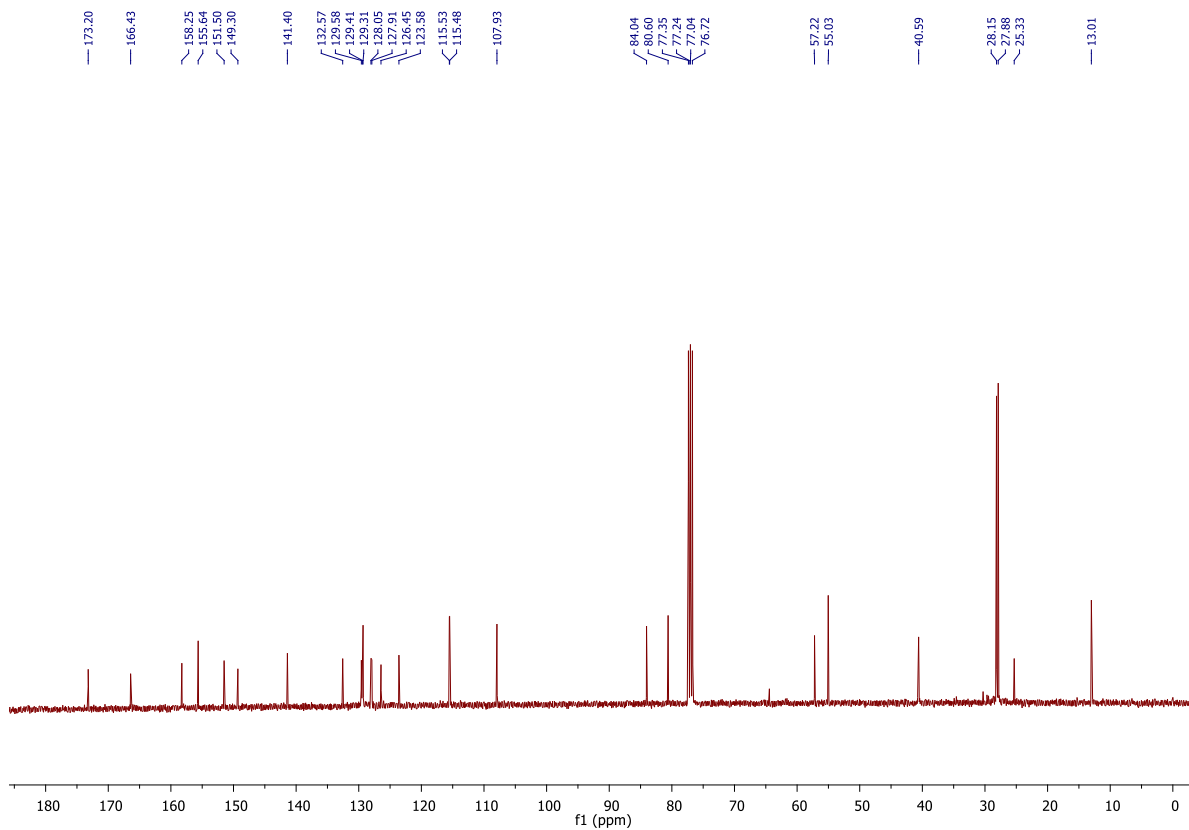

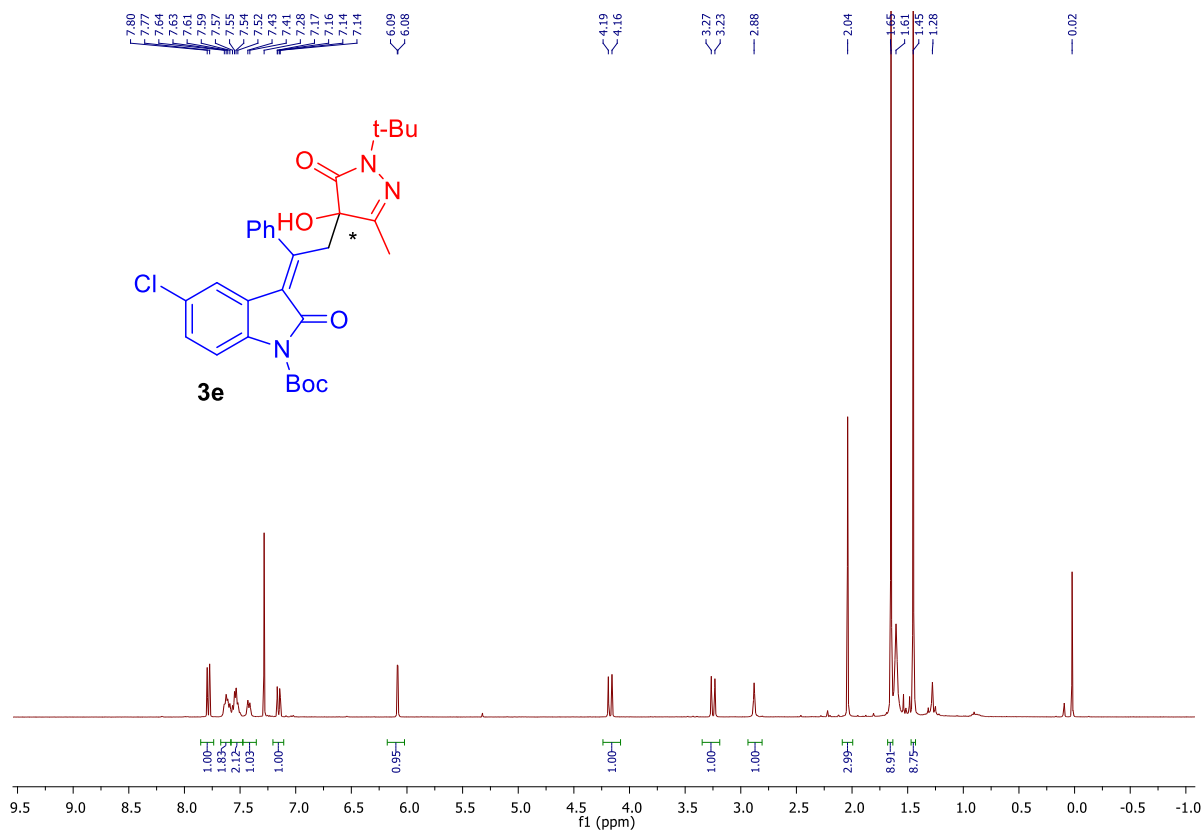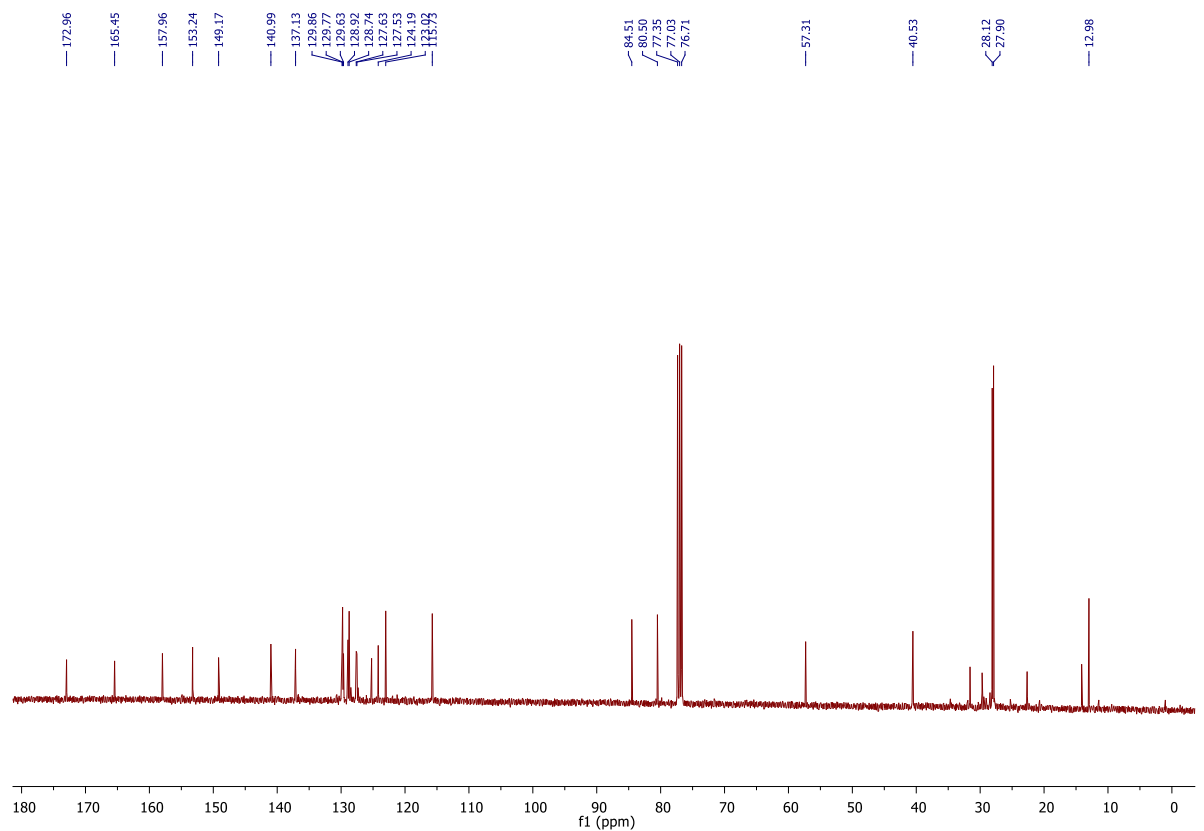

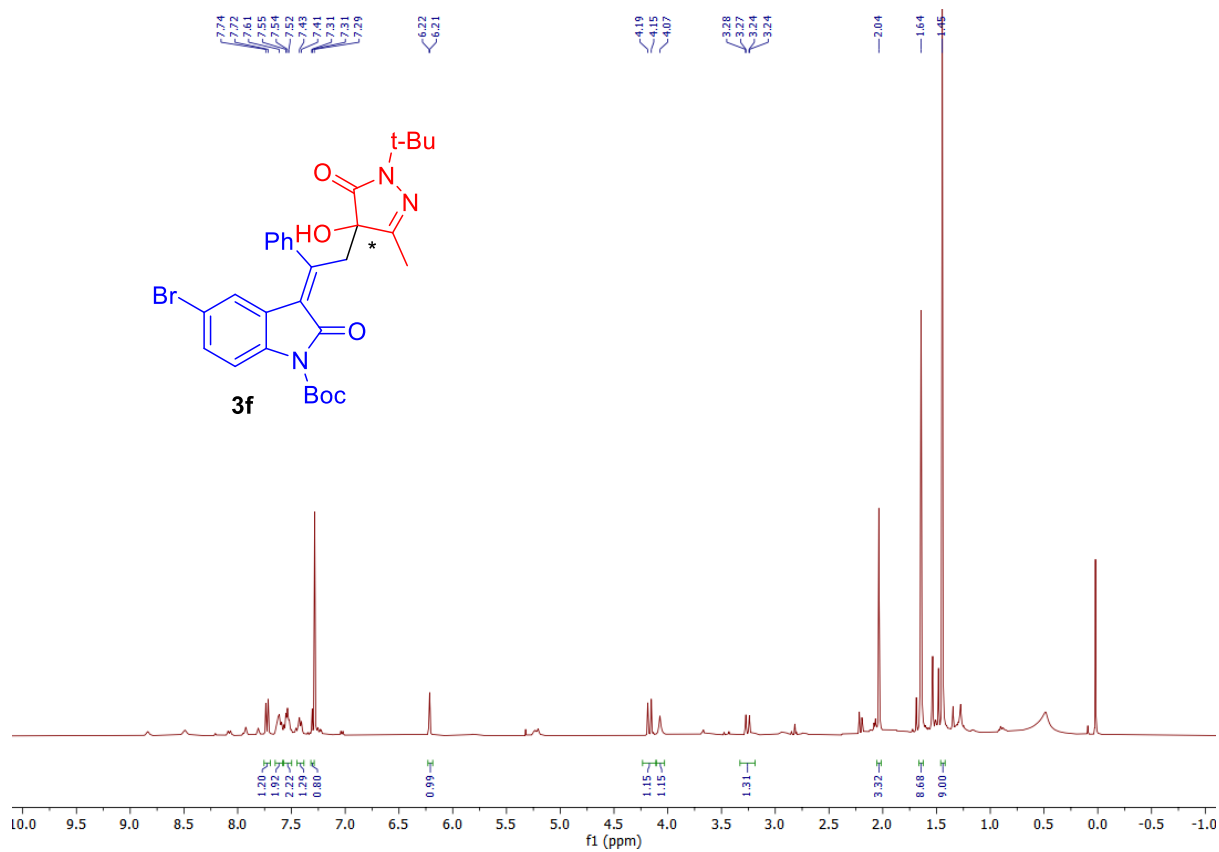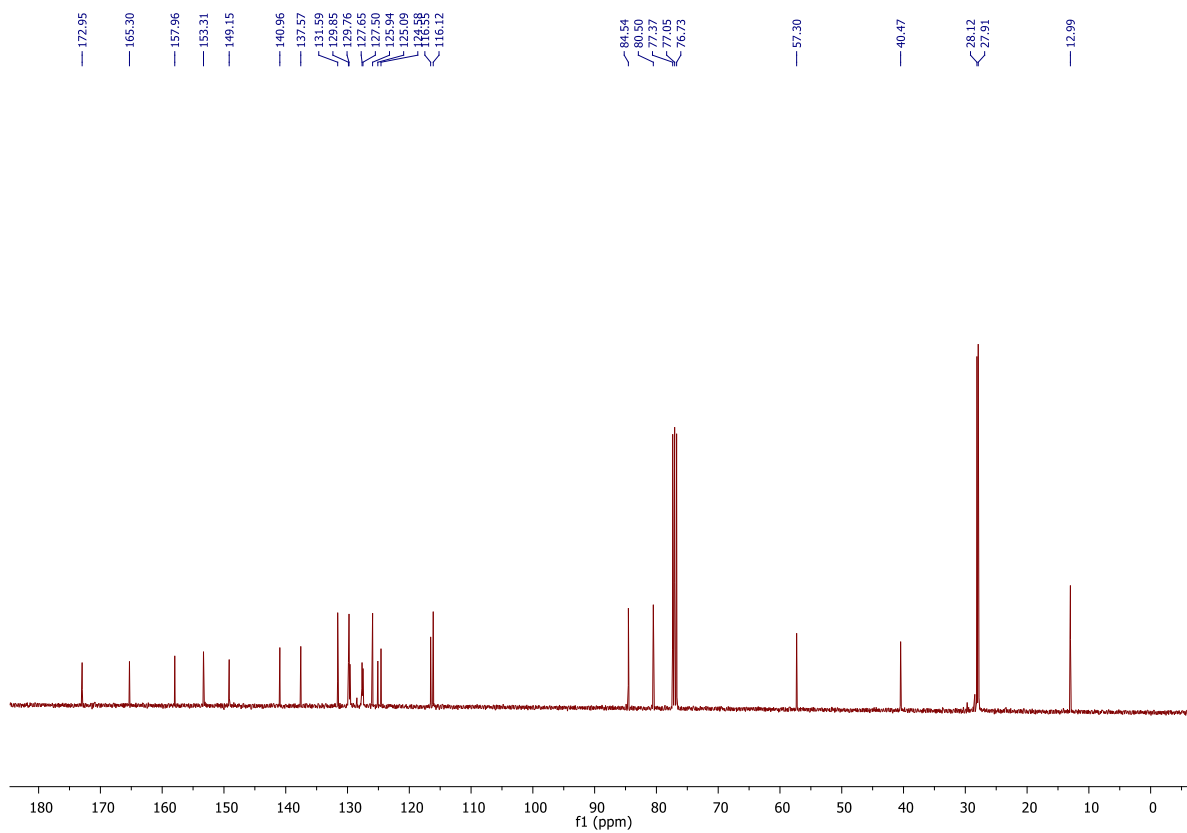

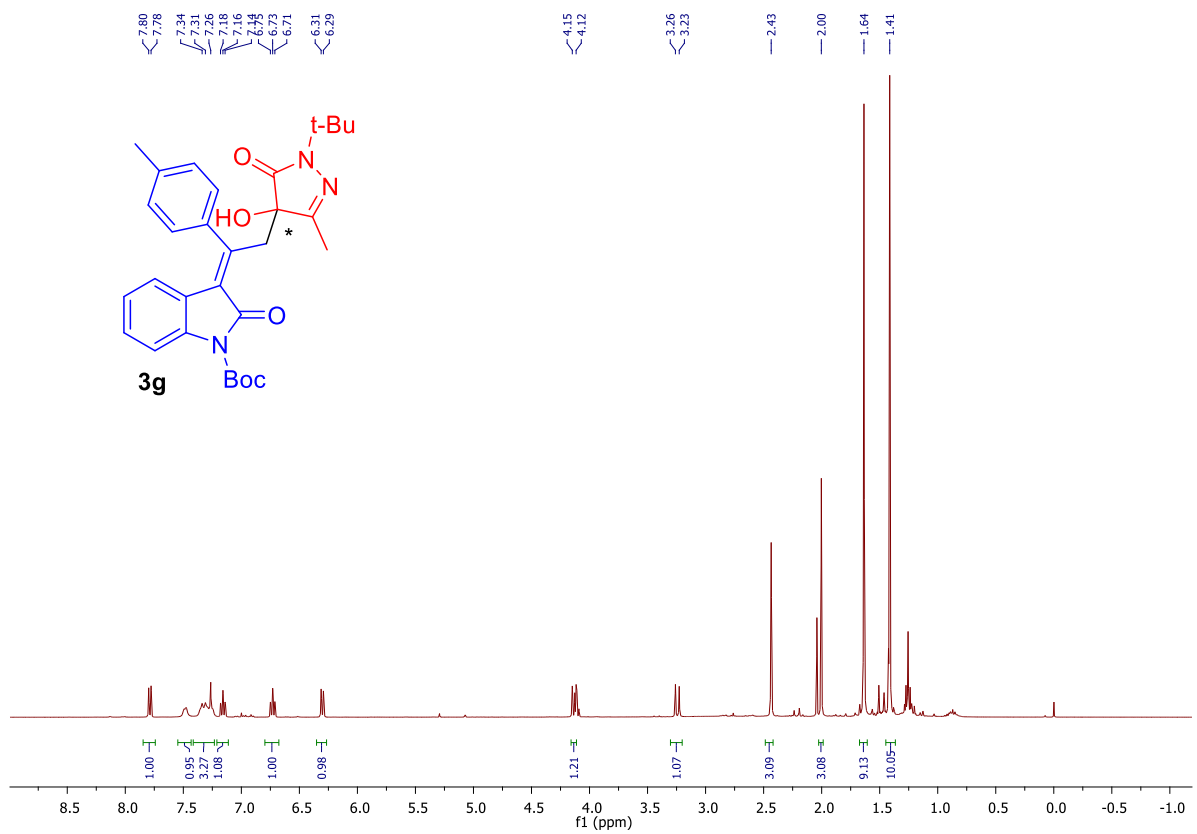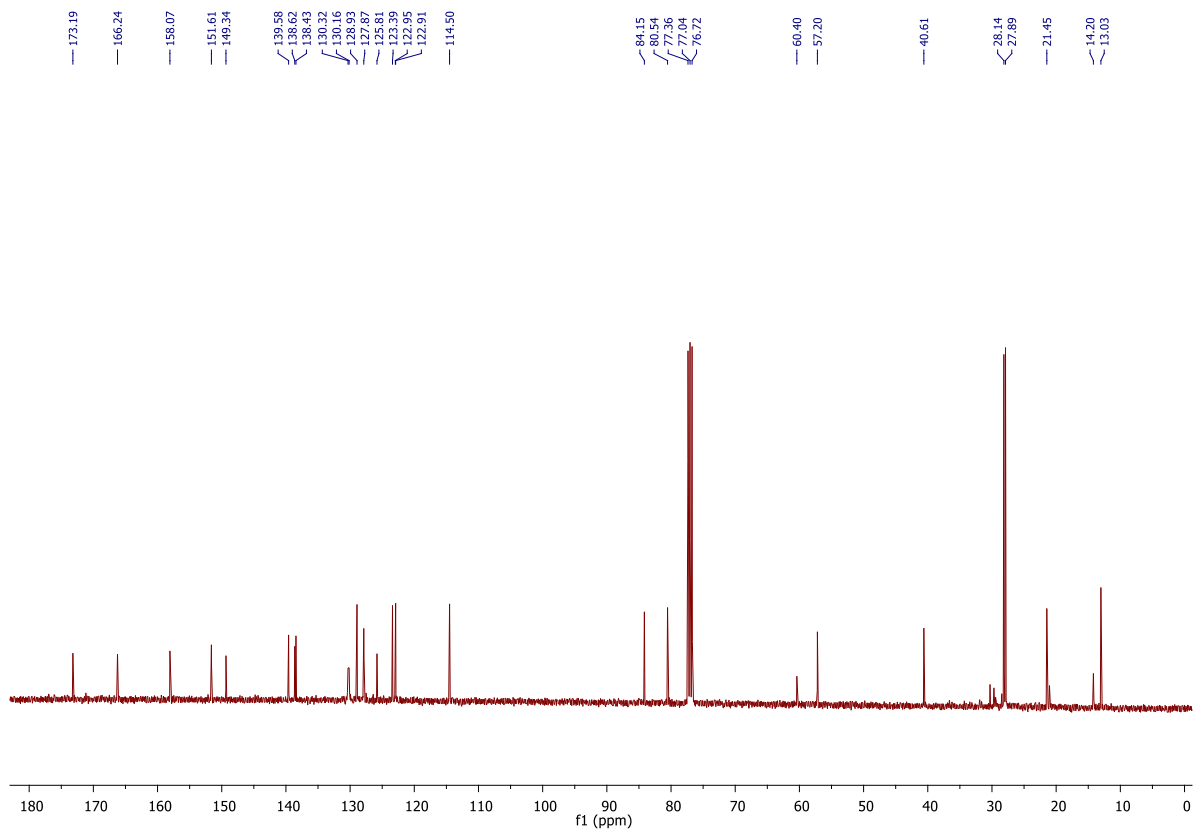

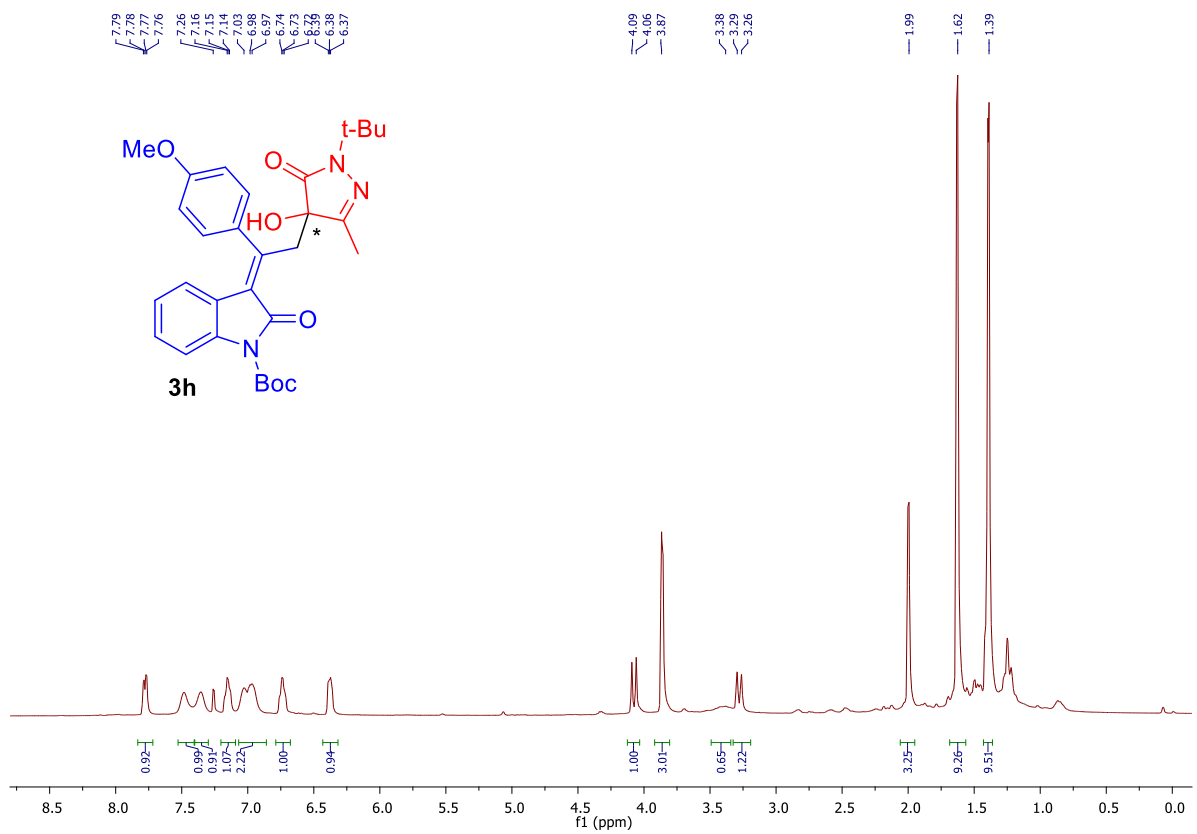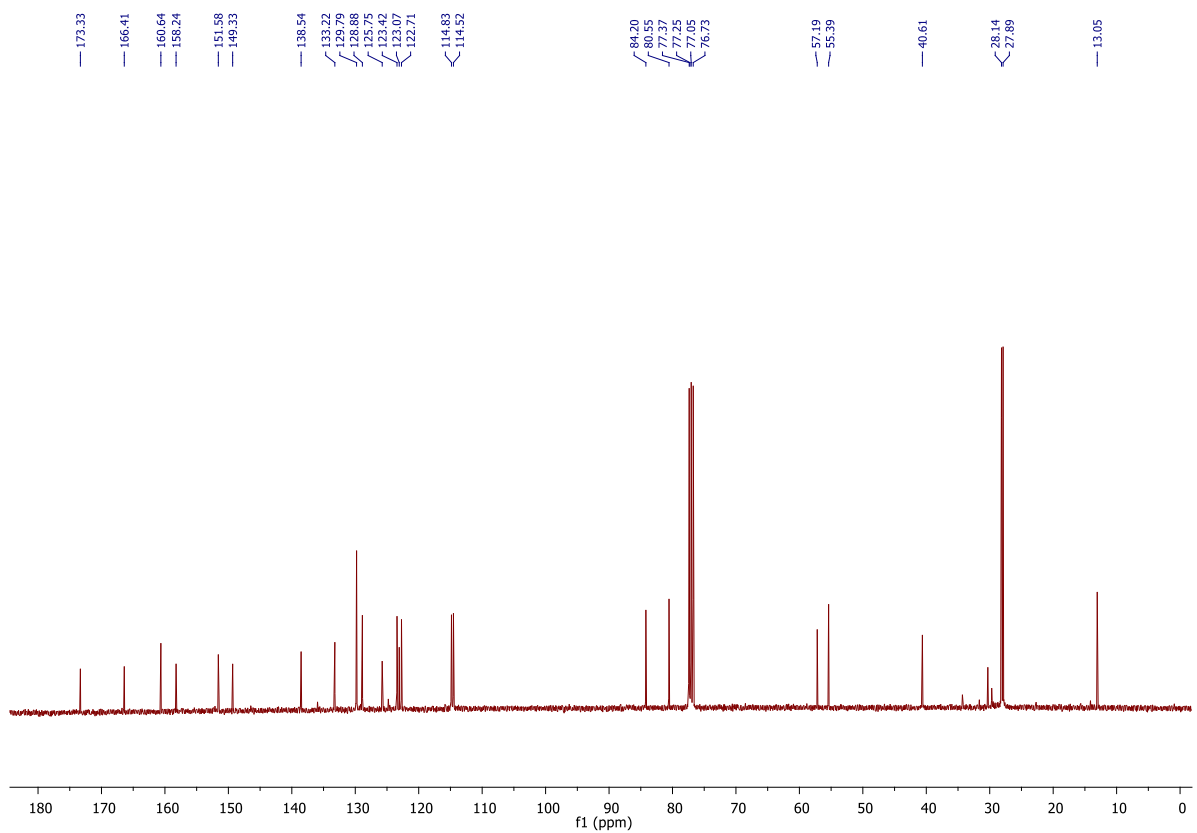

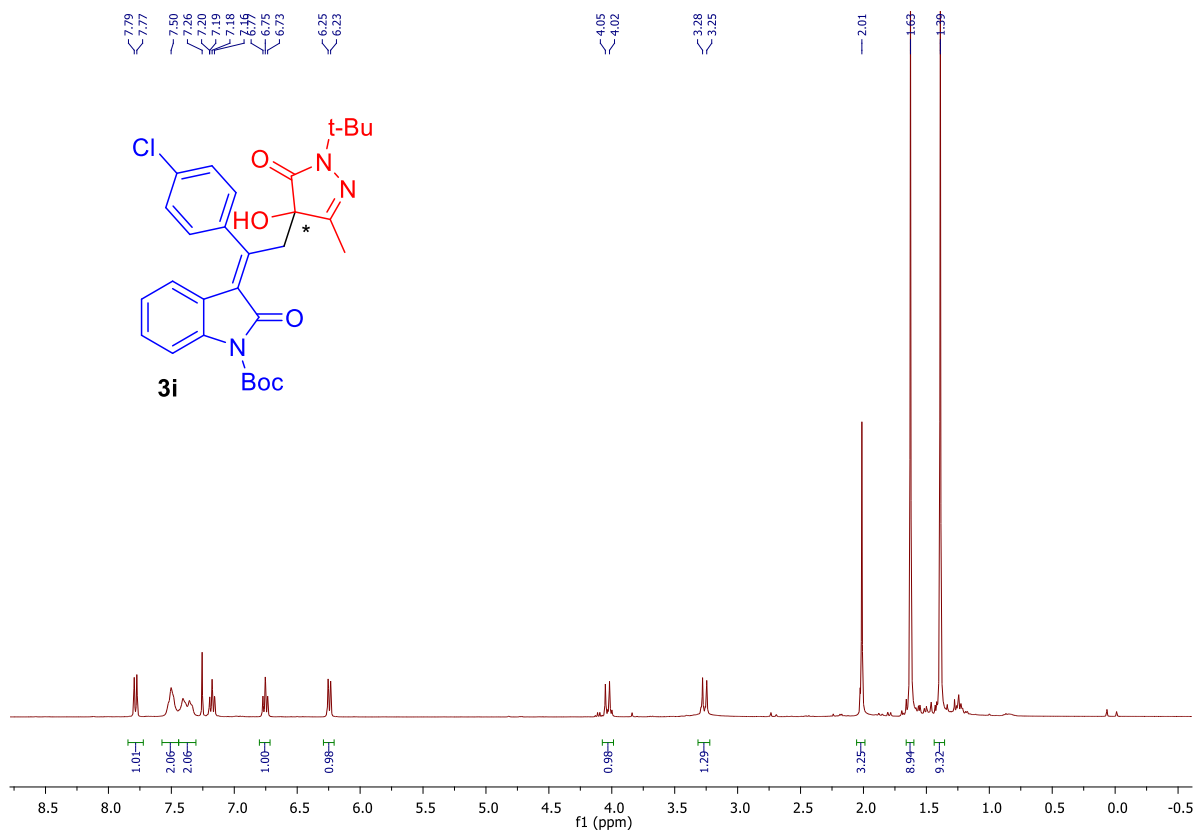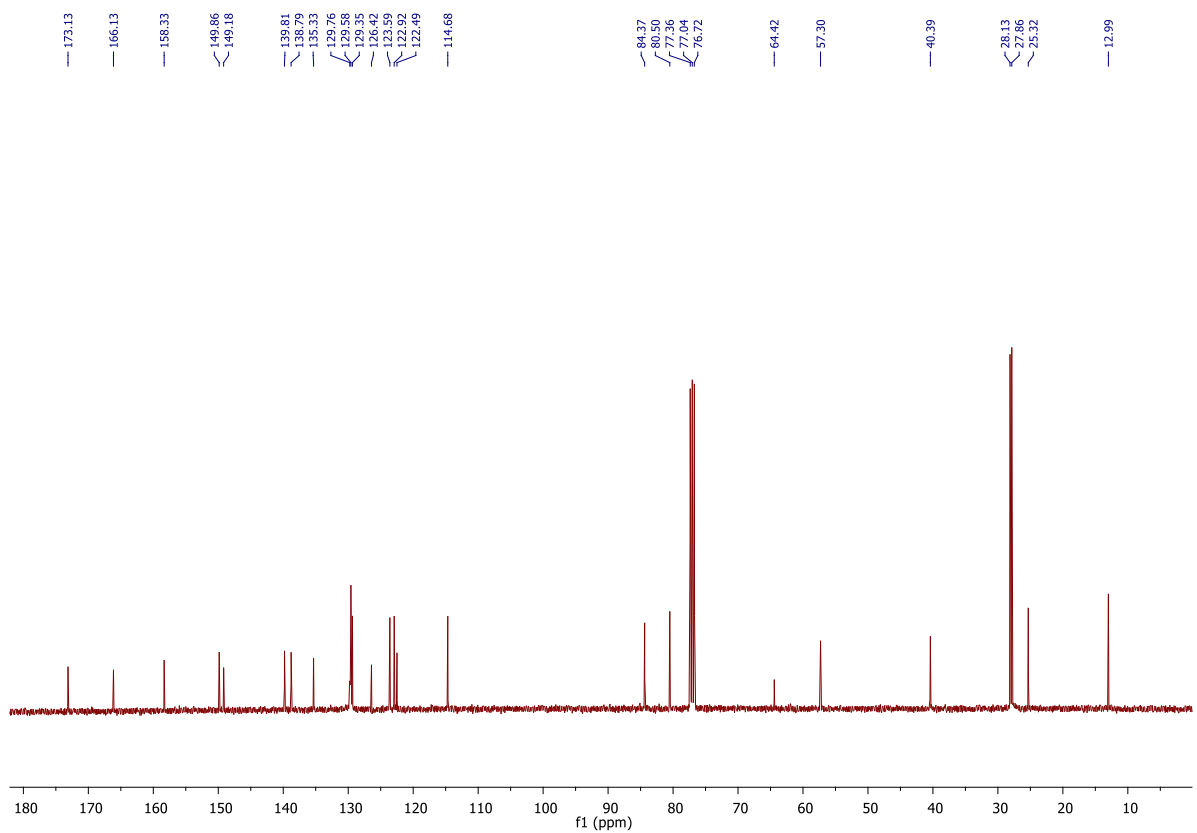



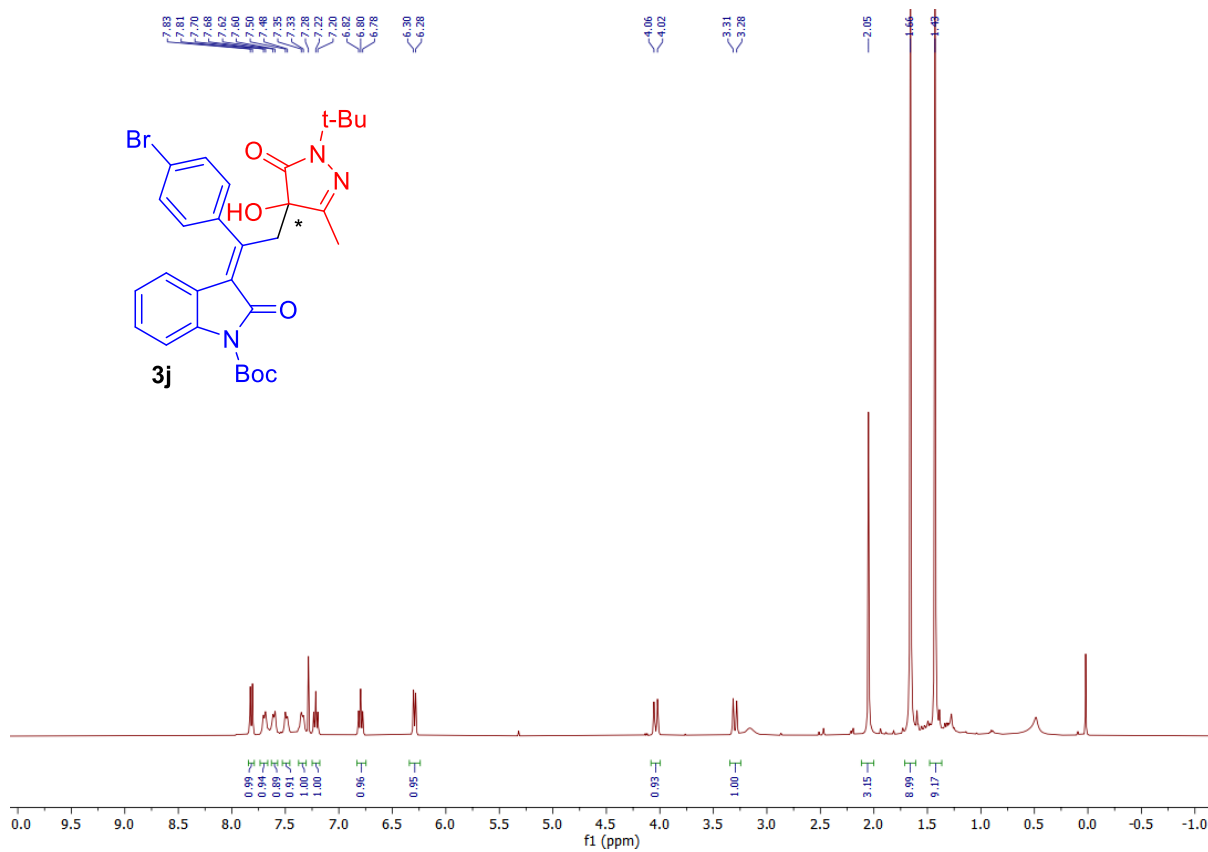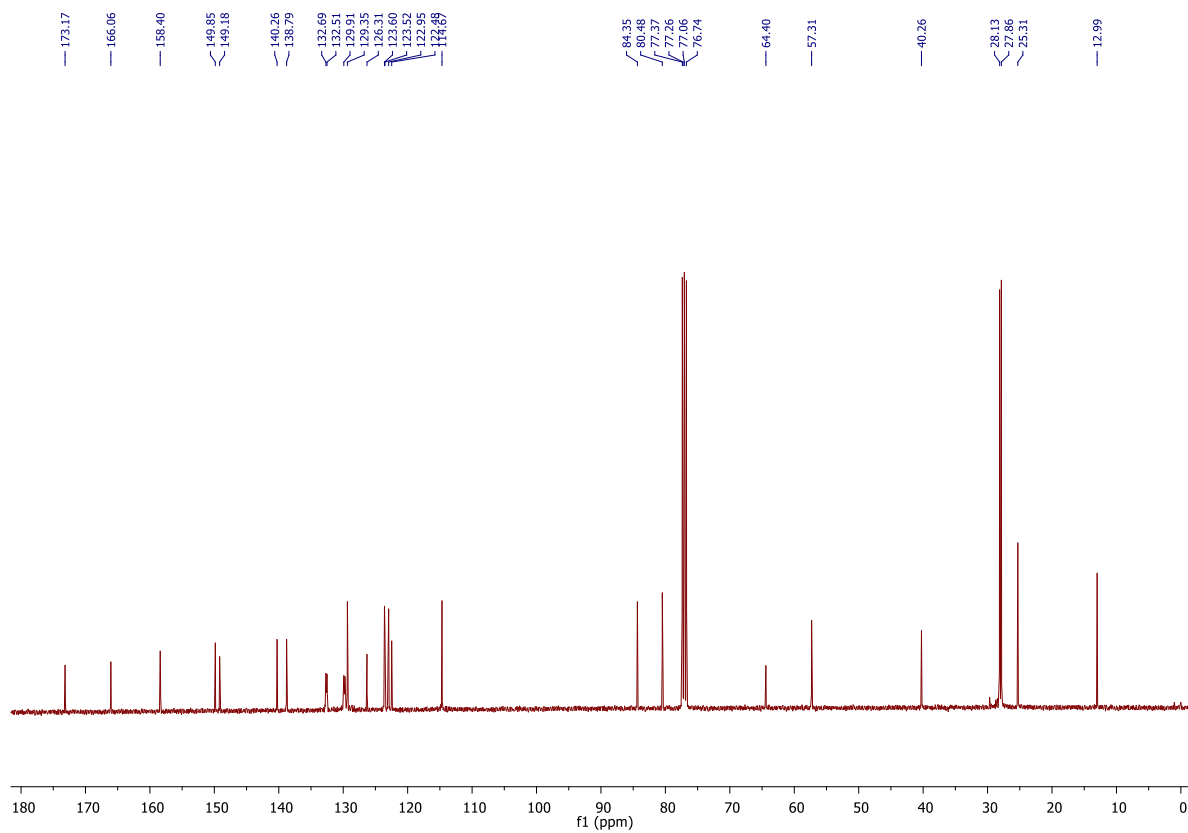



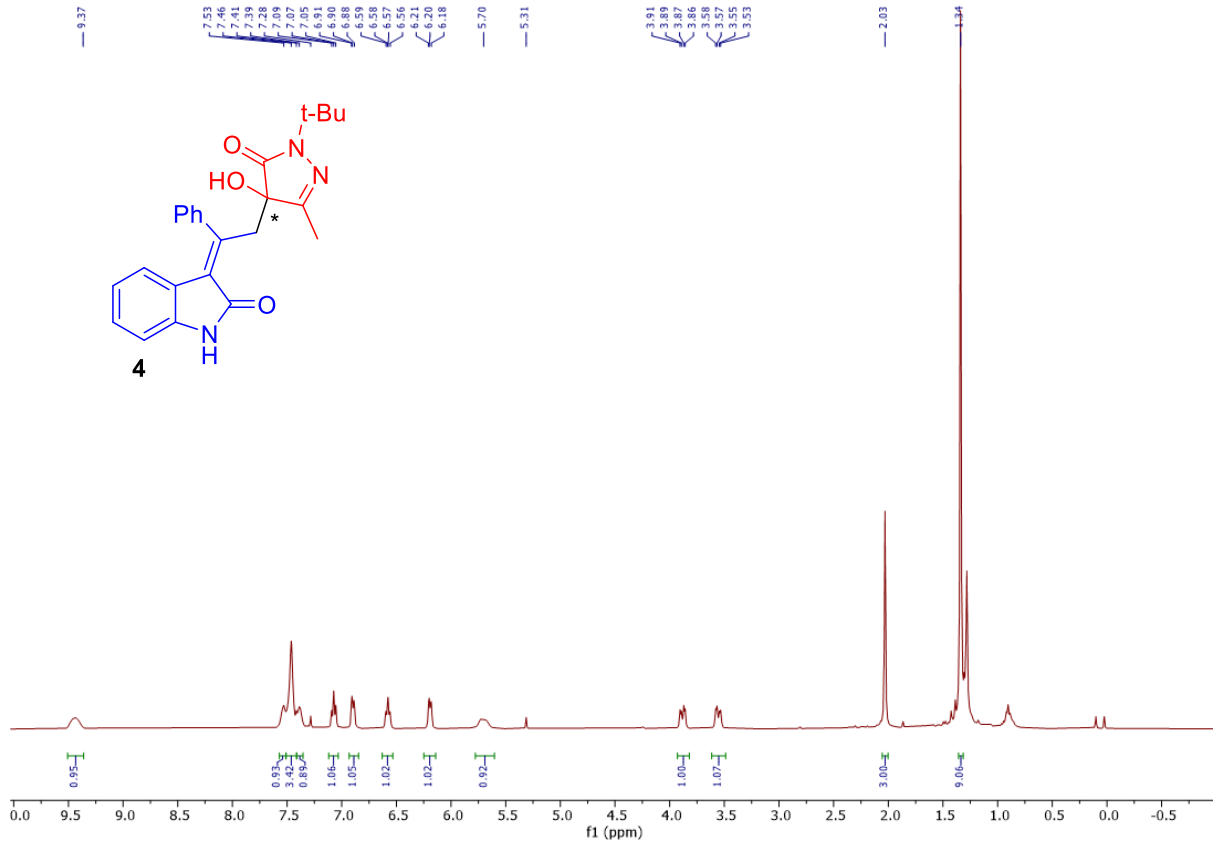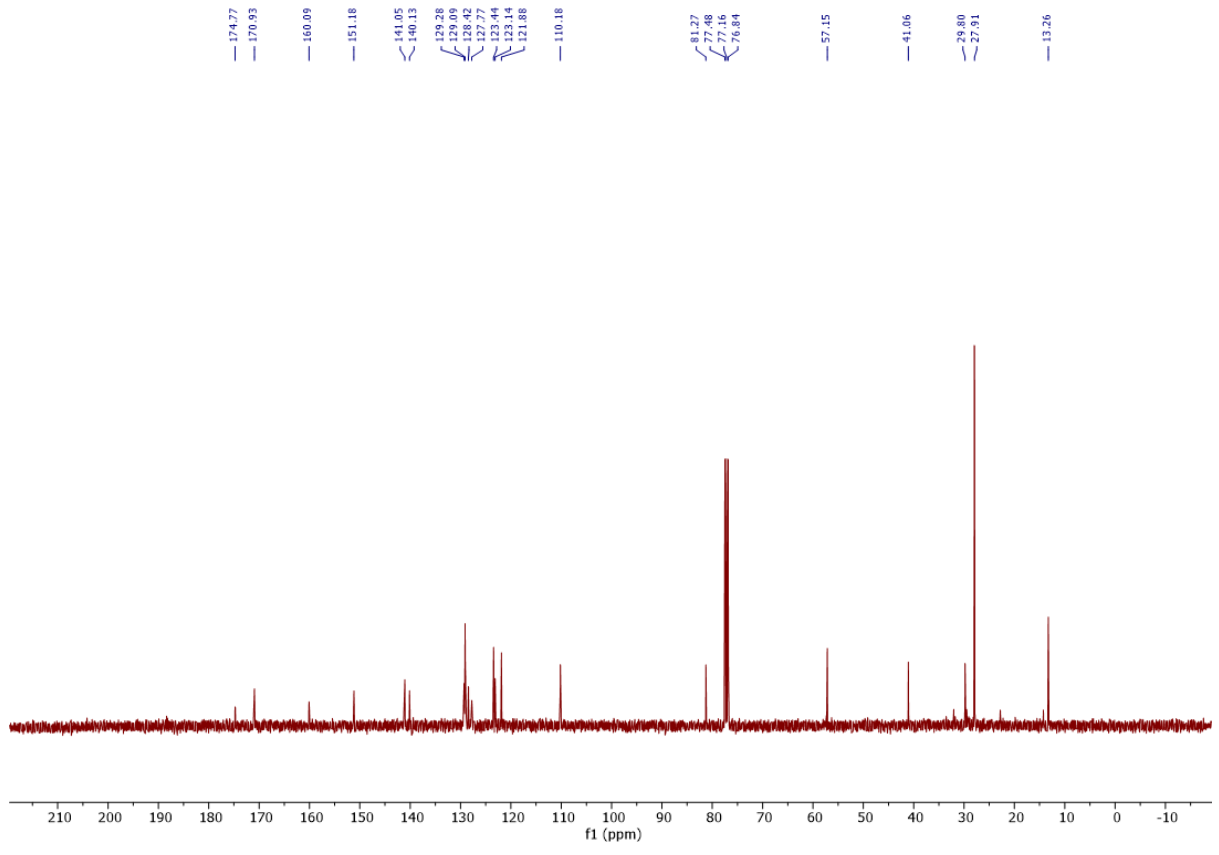

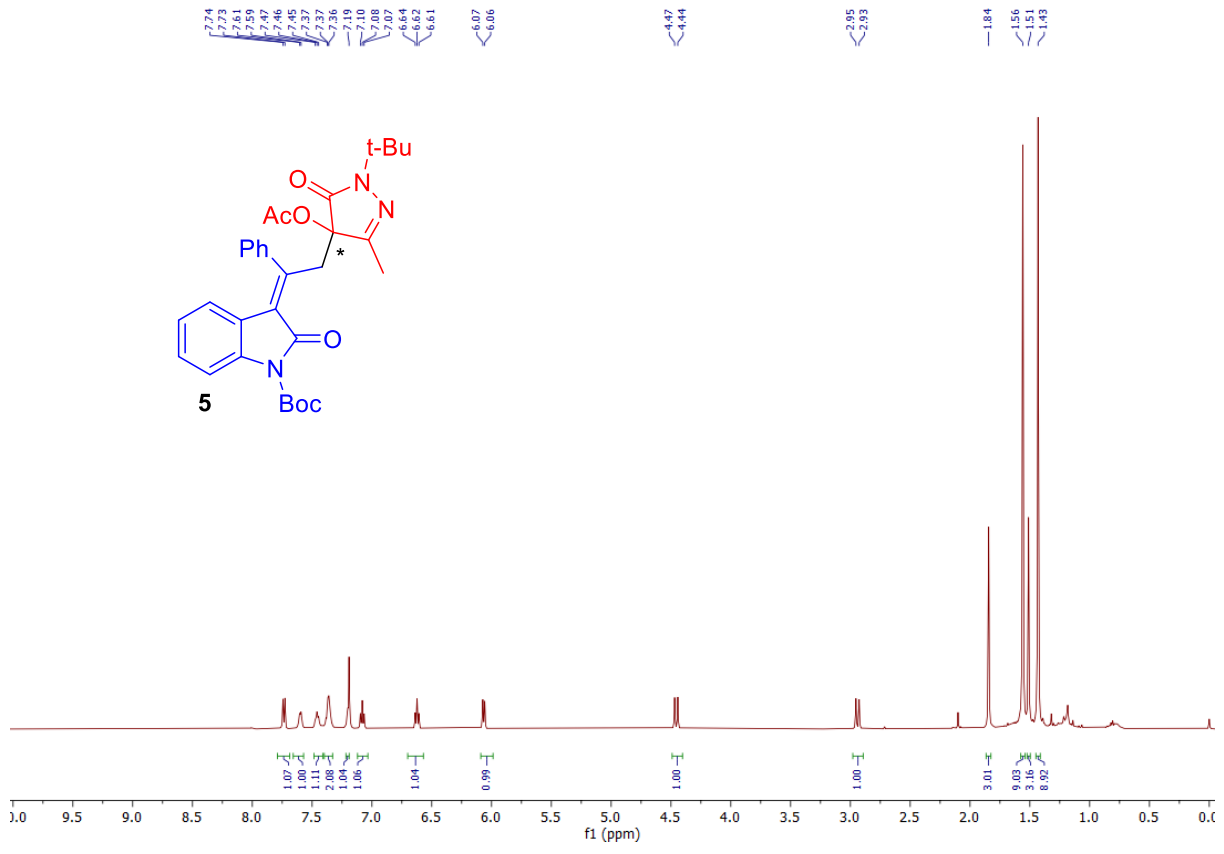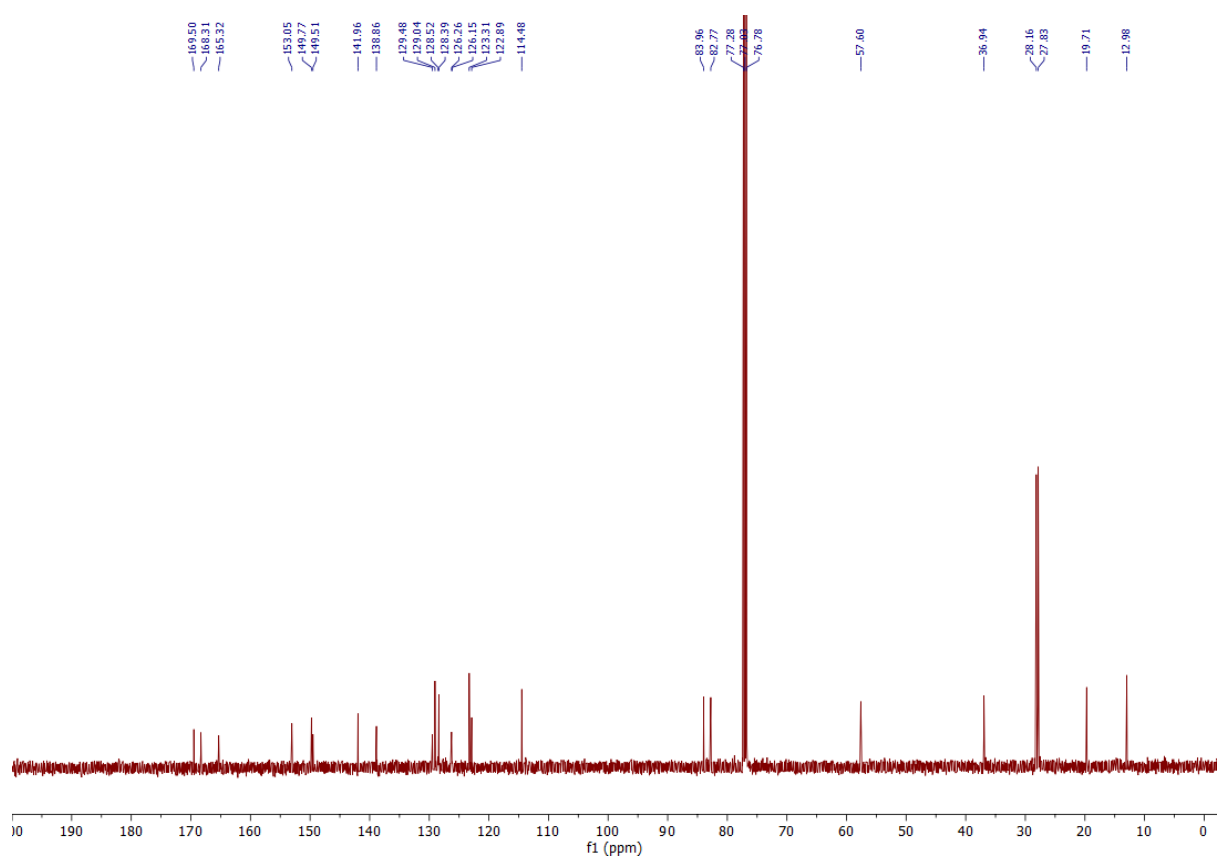

HPLC, Chiralpak IE, hexane: isopropanol = 80:20, 1 mL/min,  $\lambda = 225$  nm

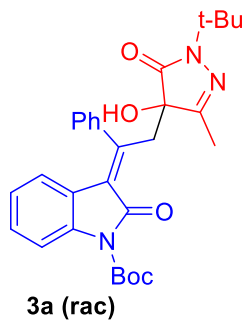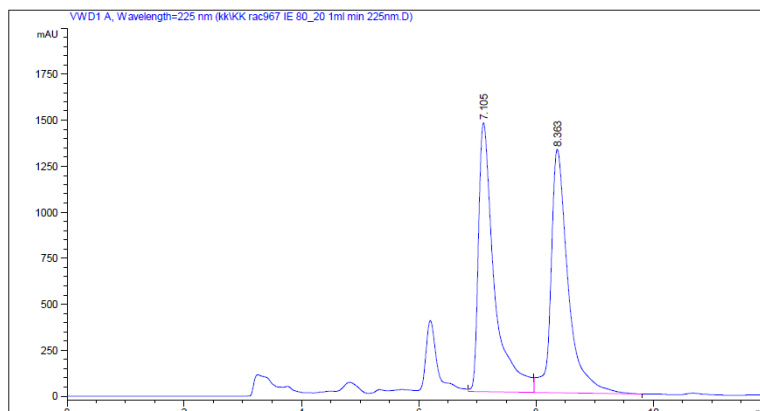

=====  
 Area Percent Report  
 =====

Sorted By : Signal  
 Multiplier : 1.0000  
 Dilution : 1.0000  
 Use Multiplier & Dilution Factor with ISTDs

Signal 1: Vwd1 A, Wavelength=225 nm

| Peak # | RetTime [min] | Type | Width [min] | Area [mAU*s] | Height [mAU] | Area %  |
|--------|---------------|------|-------------|--------------|--------------|---------|
| 1      | 7.105         | VV   | 0.2746      | 2.74940e4    | 1460.49182   | 50.4824 |
| 2      | 8.363         | VB   | 0.2988      | 2.69686e4    | 1323.32690   | 49.5176 |

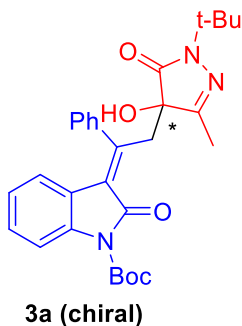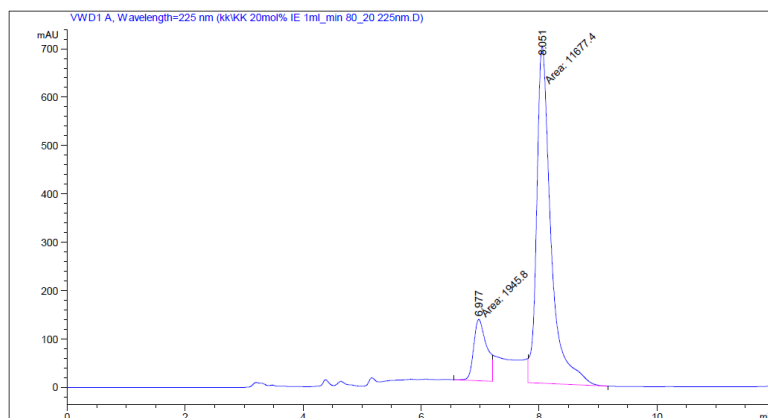

=====  
 Area Percent Report  
 =====

Sorted By : Signal  
 Multiplier : 1.0000  
 Dilution : 1.0000  
 Use Multiplier & Dilution Factor with ISTDs

Signal 1: Vwd1 A, Wavelength=225 nm

| Peak # | RetTime [min] | Type | Width [min] | Area [mAU*s] | Height [mAU] | Area %  |
|--------|---------------|------|-------------|--------------|--------------|---------|
| 1      | 6.977         | MF   | 0.2561      | 1945.80078   | 126.64944    | 14.2830 |
| 2      | 8.051         | FM   | 0.2793      | 1.16774e4    | 696.76556    | 85.7170 |

HPLC, Chiralpak IE, hexane: isopropanol = 95:05, 1 mL/min,  $\lambda = 225$  nm

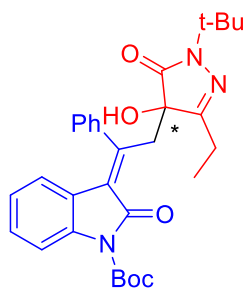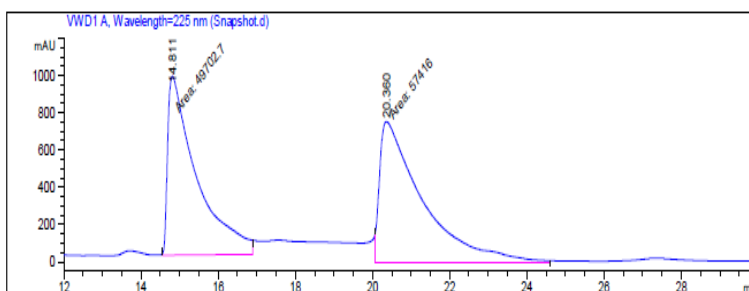

=====  
 Area Percent Report  
 =====

Sorted By : Signal  
 Multiplier : 1.0000  
 Dilution : 1.0000  
 Do not use Multiplier & Dilution Factor with ISTDs

Signal 1: WVD1 A, Wavelength=225 nm

| Peak # | RetTime [min] | Type | Width [min] | Area [mAU*s] | Height [mAU] | Area %  |
|--------|---------------|------|-------------|--------------|--------------|---------|
| 1      | 14.811        | MM   | 0.8636      | 4.97027e4    | 959.21716    | 46.3996 |
| 2      | 20.360        | MM   | 1.2713      | 5.74160e4    | 752.69354    | 53.6004 |

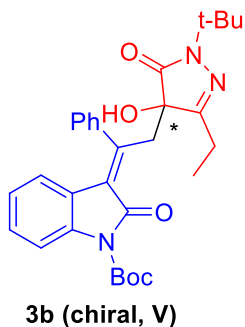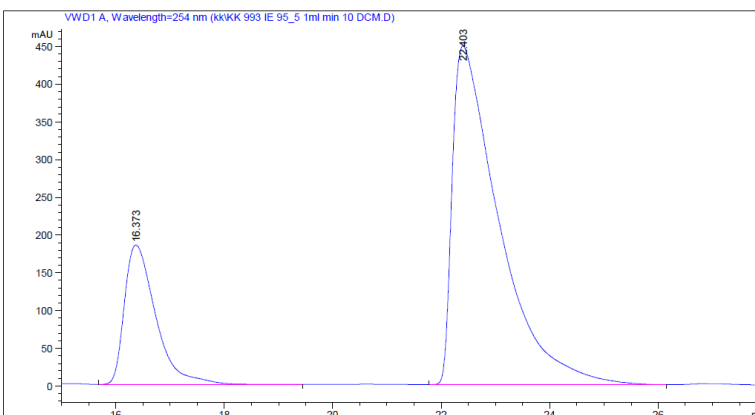

=====  
 Area Percent Report  
 =====

Sorted By : Signal  
 Multiplier : 1.0000  
 Dilution : 1.0000  
 Use Multiplier & Dilution Factor with ISTDs

Signal 1: WVD1 A, Wavelength=254 nm

| Peak # | RetTime [min] | Type | Width [min] | Area [mAU*s] | Height [mAU] | Area %  |
|--------|---------------|------|-------------|--------------|--------------|---------|
| 1      | 16.373        | BB   | 0.6128      | 7389.46436   | 184.68953    | 21.6250 |
| 2      | 22.403        | BB   | 0.8852      | 2.67815e4    | 448.81207    | 78.3750 |

HPLC, Chiralpak IE, hexane: isopropanol = 95:05, 1 mL/min,  $\lambda = 225$  nm

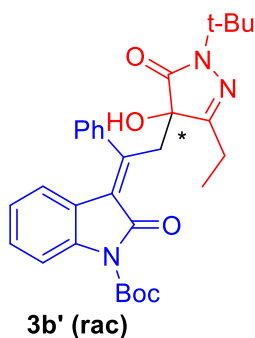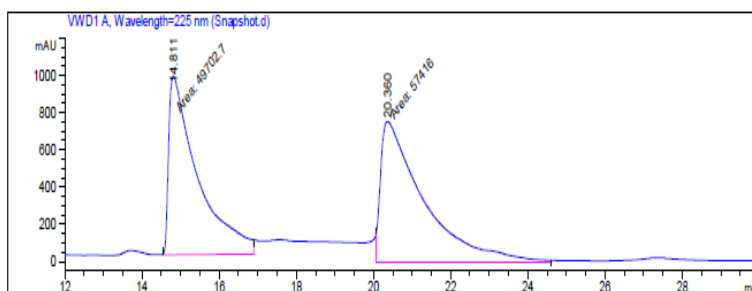

Area Percent Report

Sorted By : Signal  
Multiplier : 1.0000  
Dilution : 1.0000  
Do not use Multiplier & Dilution Factor with ISTDs

Signal 1: VWD1 A, Wavelength=225 nm

| Peak # | RetTime [min] | Type | Width [min] | Area [mAU*s] | Height [mAU] | Area %  |
|--------|---------------|------|-------------|--------------|--------------|---------|
| 1      | 14.811        | MM   | 0.8636      | 4.97027e4    | 959.21716    | 46.3996 |
| 2      | 20.360        | MM   | 1.2713      | 5.74160e4    | 752.69354    | 53.6004 |

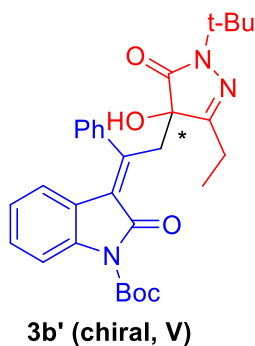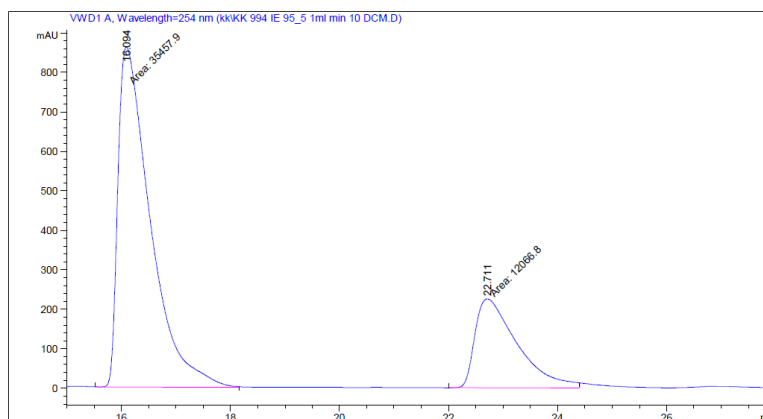

Area Percent Report

Sorted By : Signal  
Multiplier : 1.0000  
Dilution : 1.0000  
Use Multiplier & Dilution Factor with ISTDs

Signal 1: VWD1 A, Wavelength=254 nm

| Peak # | RetTime [min] | Type | Width [min] | Area [mAU*s] | Height [mAU] | Area %  |
|--------|---------------|------|-------------|--------------|--------------|---------|
| 1      | 16.094        | FM   | 0.6854      | 3.54579e4    | 862.16968    | 74.6095 |
| 2      | 22.711        | MF   | 0.8927      | 1.20668e4    | 225.27863    | 25.3905 |

HPLC, Chiralpak IE, hexane: isopropanol = 95:05, 1 mL/min,  $\lambda = 225$  nm

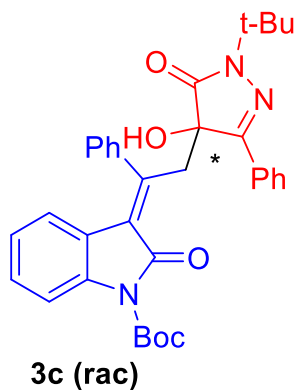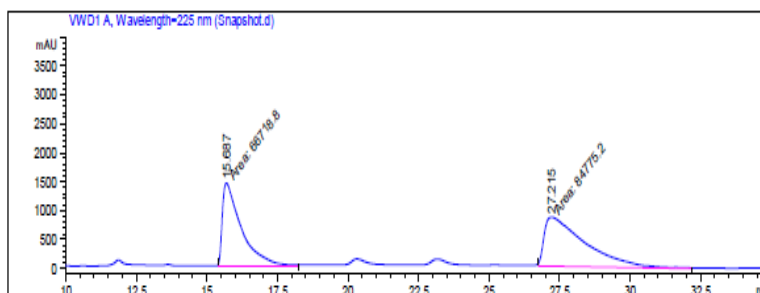

=====  
Area Percent Report  
=====

Sorted By : Signal  
Multiplier : 1.0000  
Dilution : 1.0000  
Do not use Multiplier & Dilution Factor with ISTDs

Signal 1: VWD1 A, Wavelength=225 nm

| Peak # | RetTime [min] | Type | Width [min] | Area [mAU*s] | Height [mAU] | Area %  |
|--------|---------------|------|-------------|--------------|--------------|---------|
| 1      | 15.687        | MM   | 0.7785      | 6.67188e4    | 1428.38293   | 44.0406 |
| 2      | 27.215        | MM   | 1.6762      | 8.47752e4    | 842.95227    | 55.9594 |

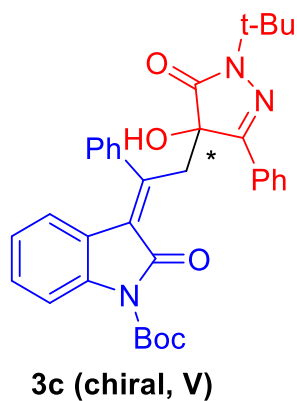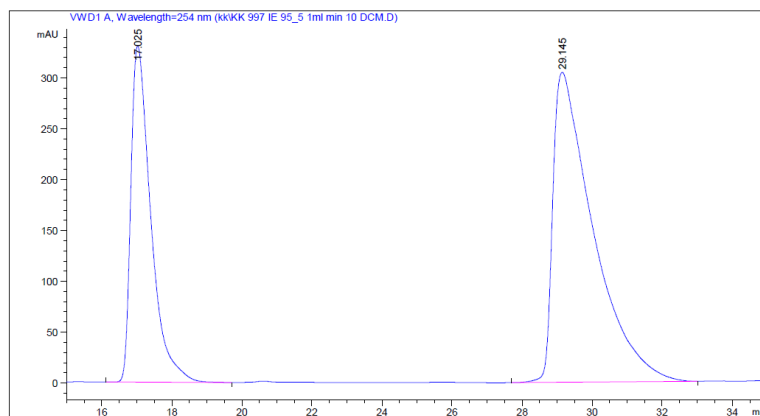

=====  
Area Percent Report  
=====

Sorted By : Signal  
Multiplier : 1.0000  
Dilution : 1.0000  
Use Multiplier & Dilution Factor with ISTDs

Signal 1: VWD1 A, Wavelength=254 nm

| Peak # | RetTime [min] | Type | Width [min] | Area [mAU*s] | Height [mAU] | Area %  |
|--------|---------------|------|-------------|--------------|--------------|---------|
| 1      | 17.025        | BB   | 0.5951      | 1.30753e4    | 330.83969    | 34.9612 |
| 2      | 29.145        | BB   | 1.0850      | 2.43241e4    | 304.80530    | 65.0388 |



HPLC, Chiralpak IE, hexane: isopropanol = 95:05, 1 mL/min,  $\lambda = 225$  nm

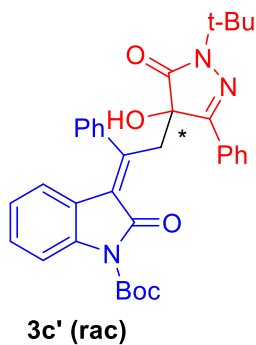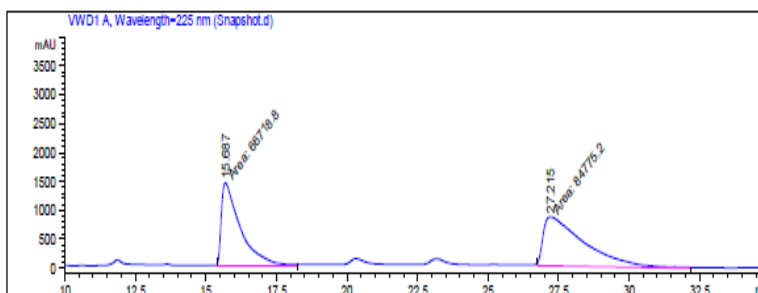

Area Percent Report

Sorted By : Signal  
Multiplier : 1.0000  
Dilution : 1.0000  
Do not use Multiplier & Dilution Factor with ISTDs

Signal 1: VWD1 A, Wavelength=225 nm

| Peak # | RetTime [min] | Type | Width [min] | Area [mAU*s] | Height [mAU] | Area %  |
|--------|---------------|------|-------------|--------------|--------------|---------|
| 1      | 15.687        | MM   | 0.7785      | 6.67188e4    | 1428.38293   | 44.0406 |
| 2      | 27.215        | MM   | 1.6762      | 8.47752e4    | 842.95227    | 55.9594 |

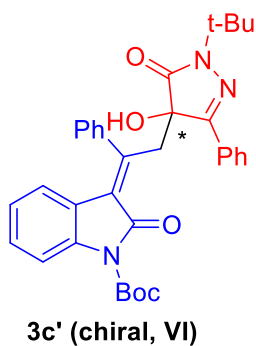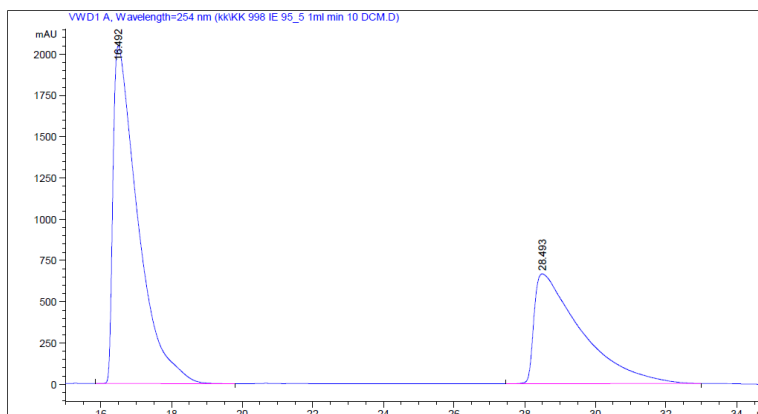

Area Percent Report

Sorted By : Signal  
Multiplier : 1.0000  
Dilution : 1.0000  
Use Multiplier & Dilution Factor with ISTDs

Signal 1: VWD1 A, Wavelength=254 nm

| Peak # | RetTime [min] | Type | Width [min] | Area [mAU*s] | Height [mAU] | Area %  |
|--------|---------------|------|-------------|--------------|--------------|---------|
| 1      | 16.492        | BB   | 0.7079      | 9.94396e4    | 2046.33875   | 61.7797 |
| 2      | 28.493        | BB   | 1.2576      | 6.15187e4    | 666.01727    | 38.2203 |

HPLC, Chiralpak IE, hexane: isopropanol = 95:05, 0.75 mL/min,  $\lambda = 225$  nm

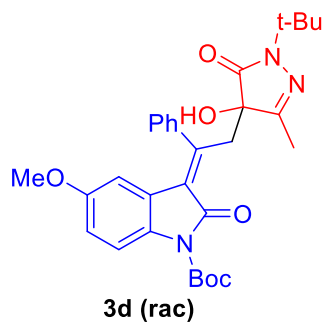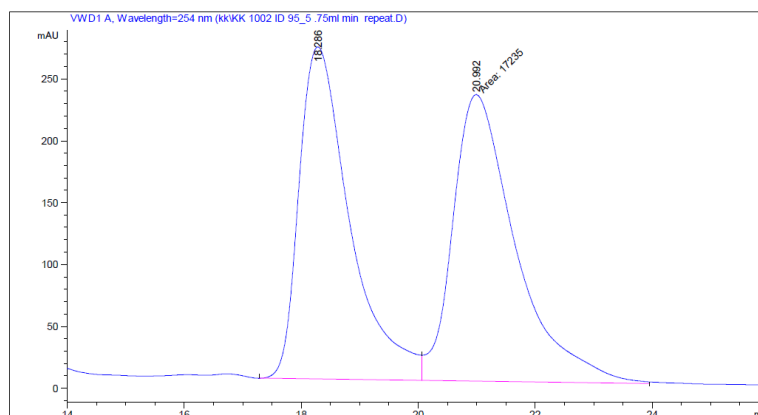

=====  
 Area Percent Report  
 =====  
 Sorted By : Signal  
 Multiplier : 1.0000  
 Dilution : 1.0000  
 Use Multiplier & Dilution Factor with ISTDs

Signal 1: VWD1 A, Wavelength=254 nm

| Peak # | RetTime [min] | Type | Width [min] | Area [mAU*s] | Height [mAU] | Area %  |
|--------|---------------|------|-------------|--------------|--------------|---------|
| 1      | 18.286        | BV   | 0.9106      | 1.62291e4    | 268.33615    | 48.4971 |
| 2      | 20.992        | MF   | 1.2411      | 1.72350e4    | 231.45508    | 51.5029 |

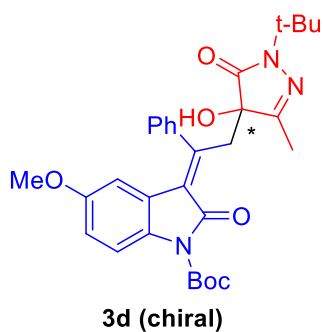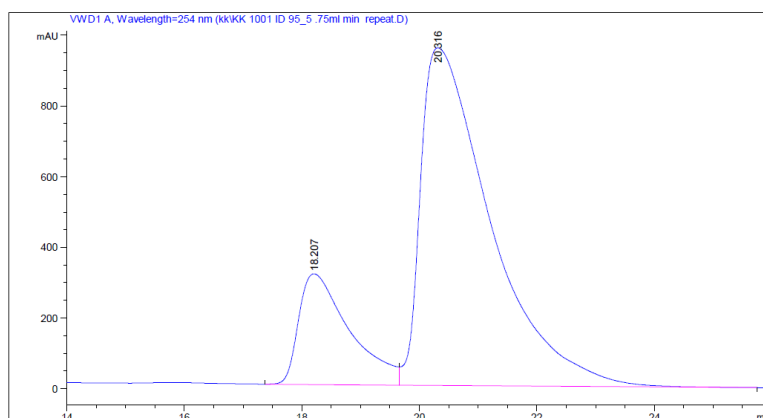

=====  
 Area Percent Report  
 =====  
 Sorted By : Signal  
 Multiplier : 1.0000  
 Dilution : 1.0000  
 Use Multiplier & Dilution Factor with ISTDs

Signal 1: VWD1 A, Wavelength=254 nm

| Peak # | RetTime [min] | Type | Width [min] | Area [mAU*s] | Height [mAU] | Area %  |
|--------|---------------|------|-------------|--------------|--------------|---------|
| 1      | 18.207        | BV   | 0.8769      | 1.87603e4    | 313.18530    | 19.2631 |
| 2      | 20.316        | VB   | 1.2215      | 7.86298e4    | 955.07318    | 80.7369 |

HPLC, Chiralpak IE, hexane: isopropanol = 95:05, 1 mL/min,  $\lambda = 225$  nm

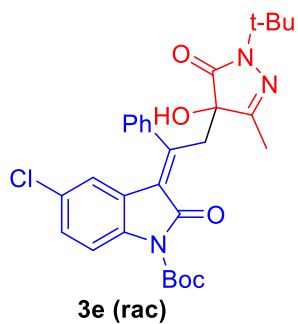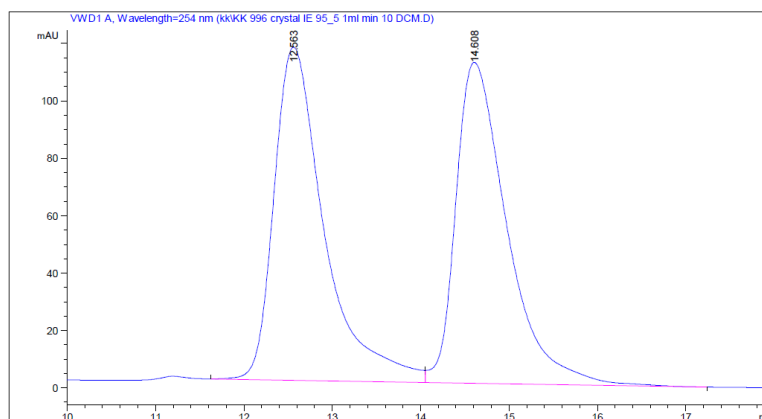

=====  
 Area Percent Report  
 =====

Sorted By : Signal  
 Multiplier : 1.0000  
 Dilution : 1.0000  
 Use Multiplier & Dilution Factor with ISTDs

Signal 1: VWD1 A, Wavelength=254 nm

| Peak # | RetTime [min] | Type | Width [min] | Area [mAU*s] | Height [mAU] | Area %  |
|--------|---------------|------|-------------|--------------|--------------|---------|
| 1      | 12.563        | BV   | 0.5926      | 4593.00928   | 116.09092    | 50.5578 |
| 2      | 14.608        | VB   | 0.6087      | 4491.66943   | 111.80619    | 49.4422 |

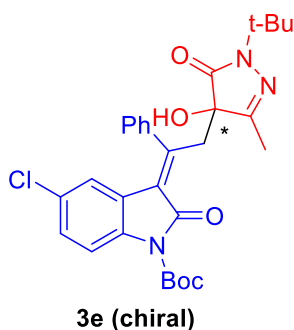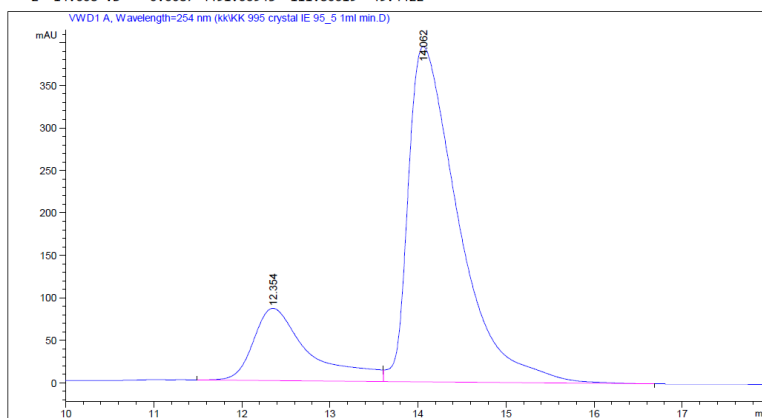

=====  
 Area Percent Report  
 =====

Sorted By : Signal  
 Multiplier : 1.0000  
 Dilution : 1.0000  
 Use Multiplier & Dilution Factor with ISTDs

Signal 1: VWD1 A, Wavelength=254 nm

| Peak # | RetTime [min] | Type | Width [min] | Area [mAU*s] | Height [mAU] | Area %  |
|--------|---------------|------|-------------|--------------|--------------|---------|
| 1      | 12.354        | BV   | 0.6370      | 3735.60547   | 85.12174     | 19.3706 |
| 2      | 14.062        | VB   | 0.5997      | 1.55494e4    | 394.64352    | 80.6294 |

HPLC, Chiralpak IB, hexane: isopropanol = 95:05, 1 mL/min,  $\lambda = 225$  nm

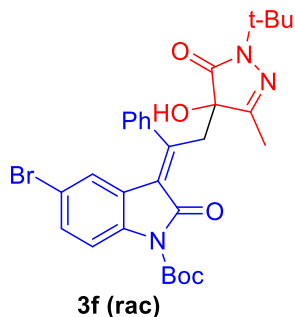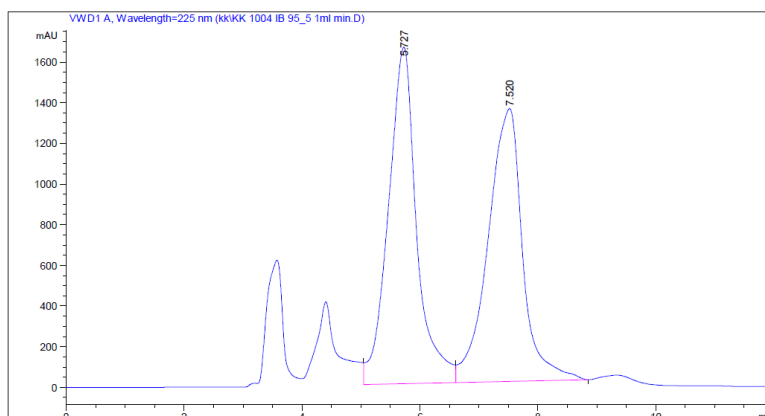

=====  
 Area Percent Report  
 =====

Sorted By : Signal  
 Multiplier : 1.0000  
 Dilution : 1.0000  
 Use Multiplier & Dilution Factor with ISTDs

Signal 1: VWD1 A, Wavelength=225 nm

| Peak # | RetTime [min] | Type | Width [min] | Area [mAU*s] | Height [mAU] | Area %  |
|--------|---------------|------|-------------|--------------|--------------|---------|
| 1      | 5.727         | VV   | 0.4748      | 5.51738e4    | 1655.62341   | 50.3024 |
| 2      | 7.520         | VB   | 0.6101      | 5.45105e4    | 1341.42908   | 49.6976 |

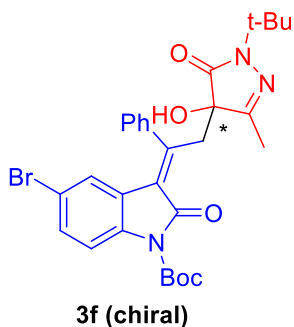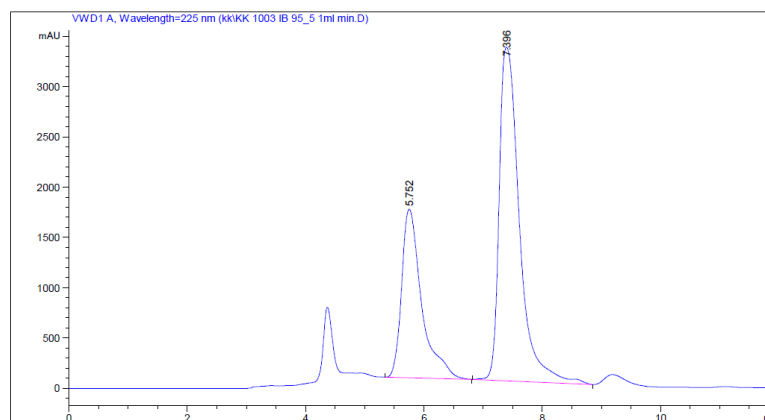

=====  
 Area Percent Report  
 =====

Sorted By : Signal  
 Multiplier : 1.0000  
 Dilution : 1.0000  
 Use Multiplier & Dilution Factor with ISTDs

Signal 1: VWD1 A, Wavelength=225 nm

| Peak # | RetTime [min] | Type | Width [min] | Area [mAU*s] | Height [mAU] | Area %  |
|--------|---------------|------|-------------|--------------|--------------|---------|
| 1      | 5.752         | BB   | 0.3511      | 3.93689e4    | 1675.55469   | 33.3669 |
| 2      | 7.396         | BV R | 0.3629      | 7.86190e4    | 3317.52466   | 66.6331 |

HPLC, Chiralpak IB, hexane: isopropanol = 95:05, 1 mL/min,  $\lambda = 225$  nm

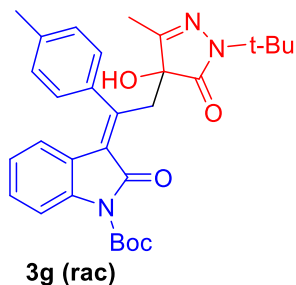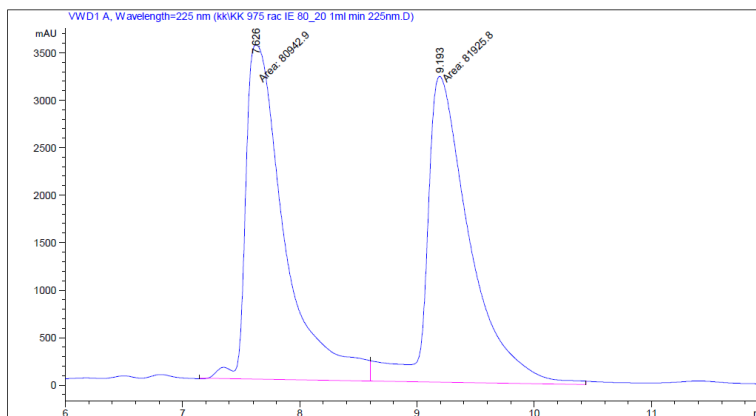

=====  
Area Percent Report  
=====

Sorted By : Signal  
Multiplier : 1.0000  
Dilution : 1.0000  
Use Multiplier & Dilution Factor with ISTDs

Signal 1: VWD1 A, Wavelength=225 nm

| Peak # | RetTime [min] | Type | Width [min] | Area [mAU*s] | Height [mAU] | Area %  |
|--------|---------------|------|-------------|--------------|--------------|---------|
| 1      | 7.626         | MF   | 0.3834      | 8.09429e4    | 3518.21631   | 49.6983 |
| 2      | 9.193         | FM   | 0.4241      | 8.19258e4    | 3219.31396   | 50.3017 |

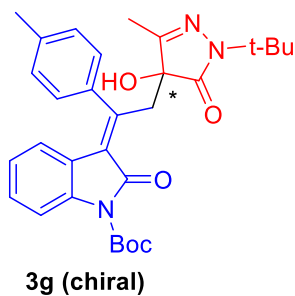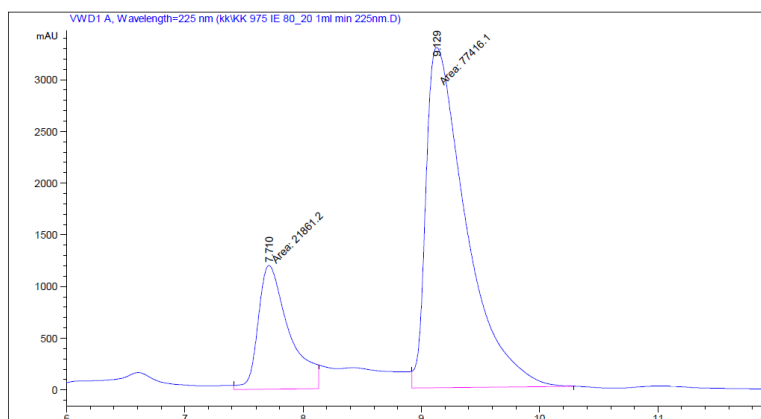

=====  
Area Percent Report  
=====

Sorted By : Signal  
Multiplier : 1.0000  
Dilution : 1.0000  
Use Multiplier & Dilution Factor with ISTDs

Signal 1: VWD1 A, Wavelength=225 nm

| Peak # | RetTime [min] | Type | Width [min] | Area [mAU*s] | Height [mAU] | Area %  |
|--------|---------------|------|-------------|--------------|--------------|---------|
| 1      | 7.710         | MF   | 0.3044      | 2.18612e4    | 1196.93115   | 22.0203 |
| 2      | 9.129         | FM   | 0.3923      | 7.74161e4    | 3289.37891   | 77.9797 |

HPLC, Chiralpak IE, hexane: isop ropanol = 95:05, 1 mL/min,  $\lambda = 225$  nm

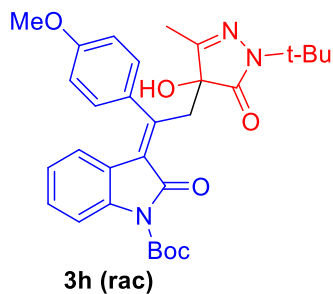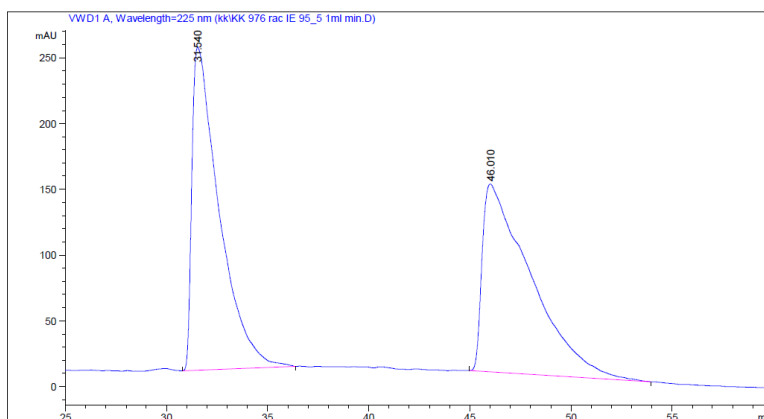

=====  
 Area Percent Report  
 =====

Sorted By : Signal  
 Multiplier : 1.0000  
 Dilution : 1.0000  
 Use Multiplier & Dilution Factor with ISTDs

Signal 1: VWD1 A, Wavelength=225 nm

| Peak # | RetTime [min] | Type | Width [min] | Area [mAU*s] | Height [mAU] | Area %  |
|--------|---------------|------|-------------|--------------|--------------|---------|
| 1      | 31.540        | BB   | 1.2986      | 2.30366e4    | 245.76431    | 49.1155 |
| 2      | 46.010        | BB   | 2.1461      | 2.38664e4    | 142.93210    | 50.8845 |

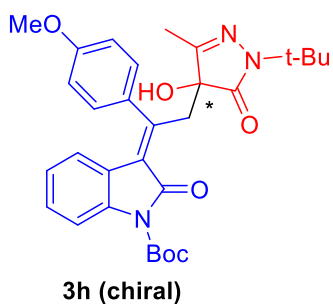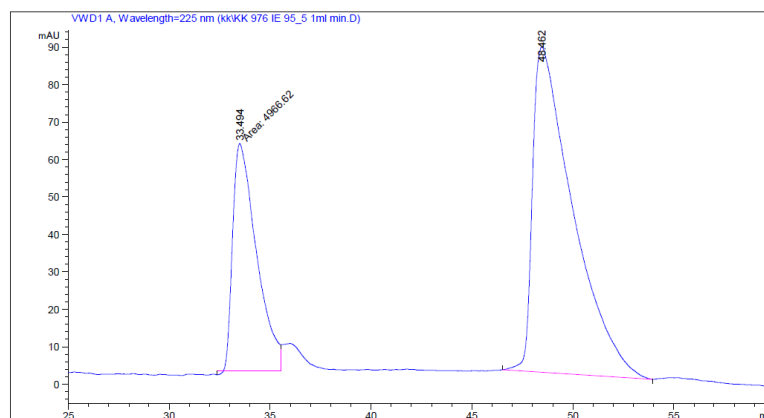

=====  
 Area Percent Report  
 =====

Sorted By : Signal  
 Multiplier : 1.0000  
 Dilution : 1.0000  
 Use Multiplier & Dilution Factor with ISTDs

Signal 1: VWD1 A, Wavelength=225 nm

| Peak # | RetTime [min] | Type | Width [min] | Area [mAU*s] | Height [mAU] | Area %  |
|--------|---------------|------|-------------|--------------|--------------|---------|
| 1      | 33.494        | MF   | 1.3652      | 4966.62305   | 60.63529     | 29.1695 |
| 2      | 48.462        | BB   | 1.8017      | 1.20601e4    | 86.81453     | 70.8305 |

HPLC, Chiralpak IE, hexane: isopropanol = 95:05, 1 mL/min,  $\lambda = 225$  nm

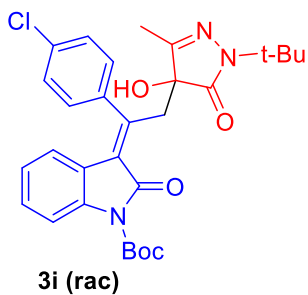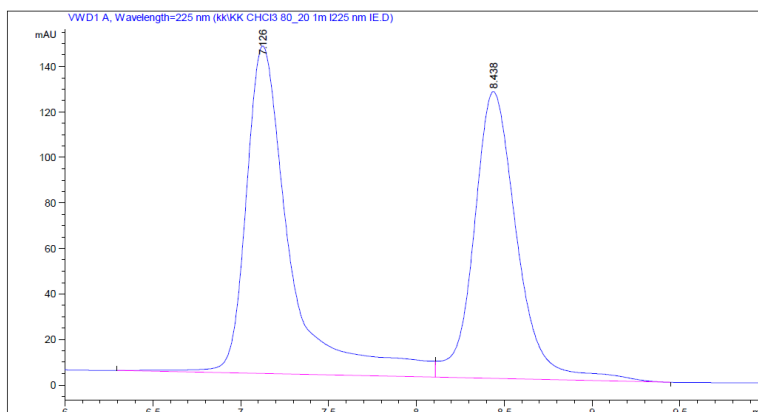

=====  
Area Percent Report  
=====

Sorted By : Signal  
Multiplier : 1.0000  
Dilution : 1.0000  
Use Multiplier & Dilution Factor with ISTDs

Signal 1: VWD1 A, Wavelength=225 nm

| Peak # | RetTime [min] | Type | Width [min] | Area [mAU*s] | Height [mAU] | Area %  |
|--------|---------------|------|-------------|--------------|--------------|---------|
| 1      | 7.126         | BV   | 0.2564      | 2509.12646   | 143.88728    | 53.8299 |
| 2      | 8.438         | VB   | 0.2582      | 2152.08789   | 126.01990    | 46.1701 |

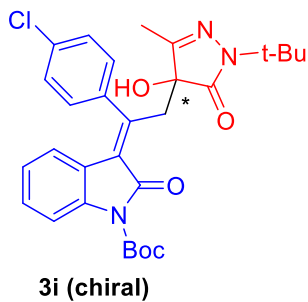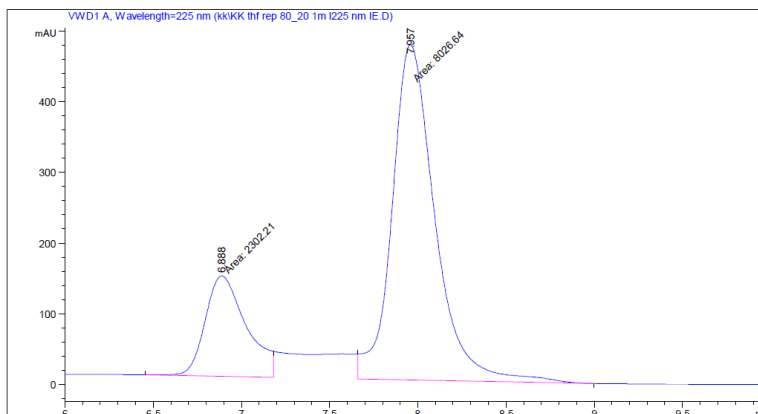

=====  
Area Percent Report  
=====

Sorted By : Signal  
Multiplier : 1.0000  
Dilution : 1.0000  
Use Multiplier & Dilution Factor with ISTDs

Signal 1: VWD1 A, Wavelength=225 nm

| Peak # | RetTime [min] | Type | Width [min] | Area [mAU*s] | Height [mAU] | Area %  |
|--------|---------------|------|-------------|--------------|--------------|---------|
| 1      | 6.888         | MF   | 0.2702      | 2302.20923   | 141.98106    | 22.2891 |
| 2      | 7.957         | FM   | 0.2824      | 8026.64453   | 473.64035    | 77.7109 |

HPLC, Chiralpak IE, hexane: isopropanol = 95:05, 1 mL/min,  $\lambda = 225$  nm

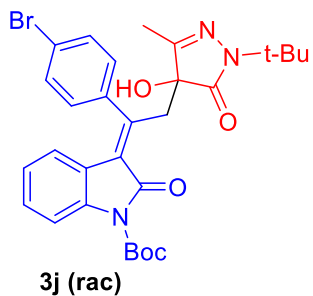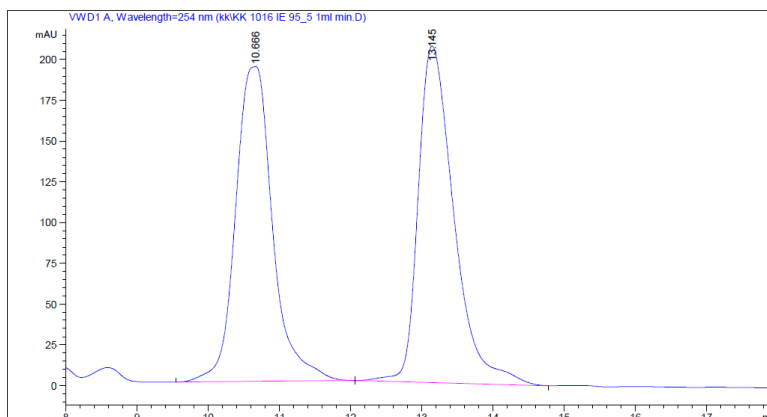

=====  
Area Percent Report  
=====

Sorted By : Signal  
Multiplier : 1.0000  
Dilution : 1.0000  
Use Multiplier & Dilution Factor with ISTDs

Signal 1: VWD1 A, Wavelength=254 nm

| Peak # | RetTime [min] | Type | Width [min] | Area [mAU*s] | Height [mAU] | Area %  |
|--------|---------------|------|-------------|--------------|--------------|---------|
| 1      | 10.666        | BB   | 0.4811      | 6991.02490   | 193.21878    | 49.2289 |
| 2      | 13.145        | BB   | 0.5370      | 7210.02295   | 206.65179    | 50.7711 |

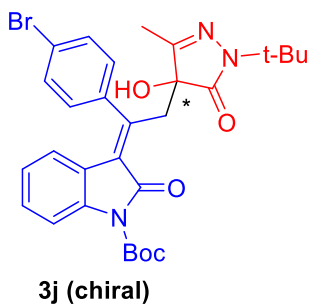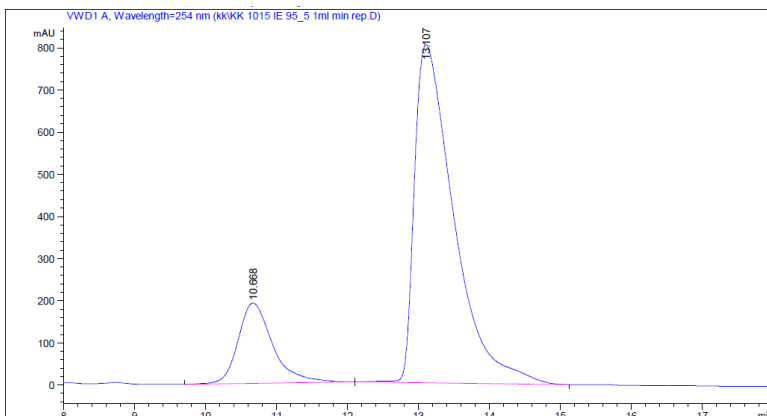

=====  
Area Percent Report  
=====

Sorted By : Signal  
Multiplier : 1.0000  
Dilution : 1.0000  
Use Multiplier & Dilution Factor with ISTDs

Signal 1: VWD1 A, Wavelength=254 nm

| Peak # | RetTime [min] | Type | Width [min] | Area [mAU*s] | Height [mAU] | Area %  |
|--------|---------------|------|-------------|--------------|--------------|---------|
| 1      | 10.668        | BB   | 0.5202      | 6436.85547   | 190.49062    | 17.2469 |
| 2      | 13.107        | BB   | 0.5824      | 3.08850e4    | 801.80225    | 82.7531 |



HPLC, Chiralpak AD-H, hexane: isopropanol = 95:05, 1 mL/min,  $\lambda = 225$  nm

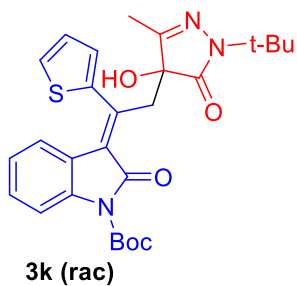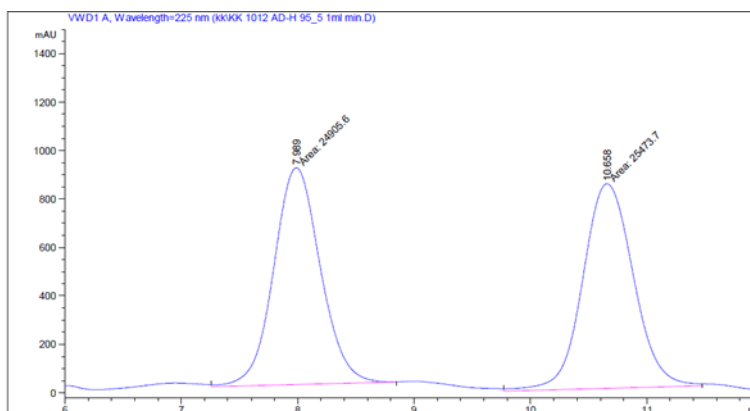

=====  
 Area Percent Report  
 =====

Sorted By : Signal  
 Multiplier : 1.0000  
 Dilution : 1.0000  
 Use Multiplier & Dilution Factor with ISTDs

Signal 1: VWD1 A, Wavelength=225 nm

| Peak # | RetTime [min] | Type | Width [min] | Area [mAU*s] | Height [mAU] | Area %  |
|--------|---------------|------|-------------|--------------|--------------|---------|
| 1      | 7.989         | MM   | 0.4643      | 2.49056e4    | 894.03729    | 49.4362 |
| 2      | 10.658        | MM   | 0.5032      | 2.54737e4    | 843.69562    | 50.5638 |

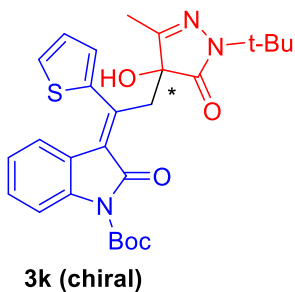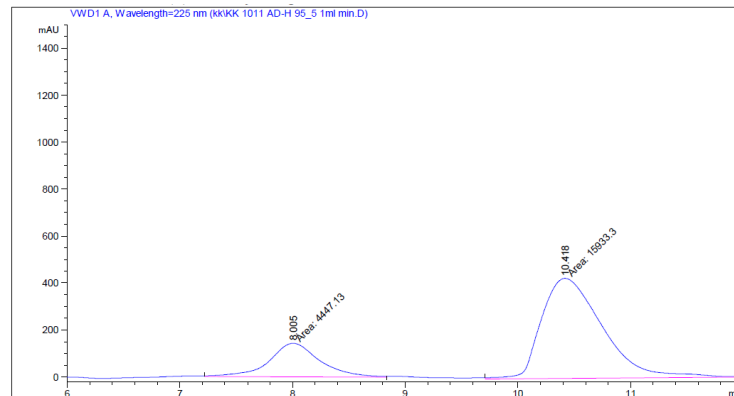

=====  
 Area Percent Report  
 =====

Sorted By : Signal  
 Multiplier : 1.0000  
 Dilution : 1.0000  
 Use Multiplier & Dilution Factor with ISTDs

Signal 1: VWD1 A, Wavelength=225 nm

| Peak # | RetTime [min] | Type | Width [min] | Area [mAU*s] | Height [mAU] | Area %  |
|--------|---------------|------|-------------|--------------|--------------|---------|
| 1      | 8.005         | MM   | 0.5200      | 4447.13281   | 142.52573    | 21.8206 |
| 2      | 10.418        | MM   | 0.6234      | 1.59333e4    | 425.95026    | 78.1794 |

HPLC, Chiralpak ID, hexane: isopropanol = 70: 30, 1mL/min,  $\lambda = 225$  nm

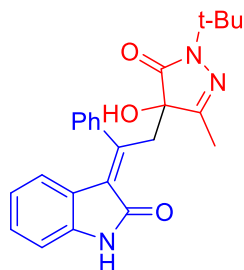

4 (rac)

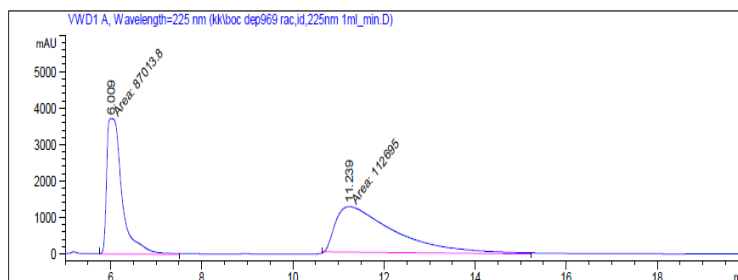

=====  
Area Percent Report  
=====

Sorted By : Signal  
Multiplier : 1.0000  
Dilution : 1.0000  
Do not use Multiplier & Dilution Factor with ISTDs

Signal 1: WVD1 A, Wavelength=225 nm

| Peak # | RetTime [min] | Type | Width [min] | Area [mAU*s] | Height [mAU] | Area %  |
|--------|---------------|------|-------------|--------------|--------------|---------|
| 1      | 6.009         | MM   | 0.3905      | 8.70138e4    | 3713.54980   | 43.5703 |
| 2      | 11.239        | MM   | 1.5048      | 1.12695e5    | 1248.14160   | 56.4297 |

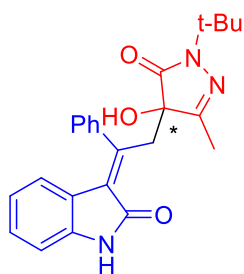

4 (chiral)

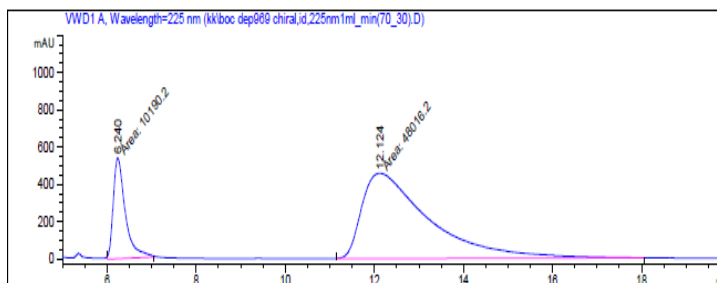

=====  
Area Percent Report  
=====

Sorted By : Signal  
Multiplier : 1.0000  
Dilution : 1.0000  
Do not use Multiplier & Dilution Factor with ISTDs

Signal 1: WVD1 A, Wavelength=225 nm

| Peak # | RetTime [min] | Type | Width [min] | Area [mAU*s] | Height [mAU] | Area %  |
|--------|---------------|------|-------------|--------------|--------------|---------|
| 1      | 6.240         | MM   | 0.3144      | 1.01902e4    | 540.24963    | 17.5069 |
| 2      | 12.124        | MM   | 1.7471      | 4.80162e4    | 458.04709    | 82.4931 |

HPLC, Chiralpak IE, hexane: isopropanol = 97: 03, 0.5mL/min,  $\lambda = 225$  nm

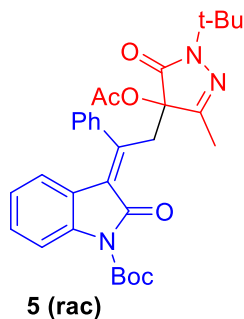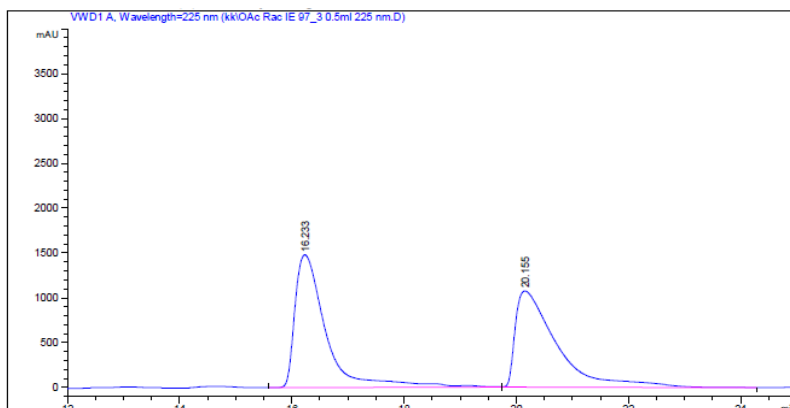

Area Percent Report

Sorted By : Signal  
Multiplier : 1.0000  
Dilution : 1.0000  
Use Multiplier & Dilution Factor with ISTDs

Signal 1: VWD1 A, Wavelength=225 nm

| Peak # | RetTime [min] | Type | Width [min] | Area [mAU*s] | Height [mAU] | Area %  |
|--------|---------------|------|-------------|--------------|--------------|---------|
| 1      | 16.233        | BV R | 0.5826      | 5.79507e4    | 1481.98560   | 51.0557 |
| 2      | 20.155        | BB   | 0.7340      | 5.46915e4    | 1070.62488   | 48.9443 |

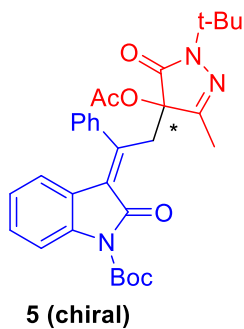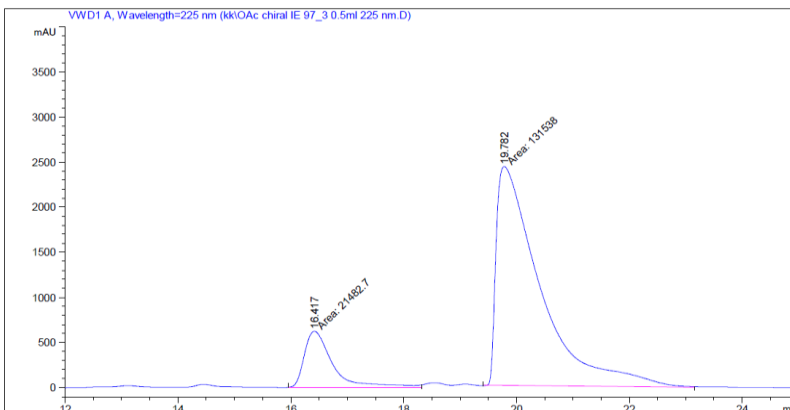

Area Percent Report

Sorted By : Signal  
Multiplier : 1.0000  
Dilution : 1.0000  
Use Multiplier & Dilution Factor with ISTDs

Signal 1: VWD1 A, Wavelength=225 nm

| Peak # | RetTime [min] | Type | Width [min] | Area [mAU*s] | Height [mAU] | Area %  |
|--------|---------------|------|-------------|--------------|--------------|---------|
| 1      | 16.417        | MM   | 0.5779      | 2.14827e4    | 619.53278    | 14.0391 |
| 2      | 19.782        | MM   | 0.9041      | 1.31538e5    | 2424.92065   | 85.9609 |
